# Supplementary material for: Impact of cardiovascular disease and risk factors on fatal outcomes in patients with COVID-19 according to age: a systematic review and meta-analysis
Source: HighWire-hosted journal article supplement (doi:10.1136/heartjnl-2020-317901), 2020-12-17
Supplement: heartjnl-2020-317901supp001_data_supplement.pdf [file heartjnl-2020-317901supp001_data_supplement.pdf]

### Supplementary Online Content

Supplementary table 1. Search strategy

Supplementary table 2. Baseline patient characteristics

Supplementary table 3. Small-study effect or publication bias

Supplementary table 4. Sensitivity analysis performed based on study size

Supplementary table 5. Sensitivity analysis performed by omitting individual studies: hypertension and clinical outcomes

Supplementary table 6. Sensitivity analysis performed by omitting individual studies: diabetes and clinical outcomes

Supplementary table 7. Sensitivity analysis performed by omitting individual studies: CVD and clinical outcomes

Supplementary figure 1. Meta-analysis of the prevalence of hypertension

Supplementary figure 2. Meta-analysis of the clinical outcomes of patients with hypertension: severe COVID-19

Supplementary figure 3. Meta-analysis of the clinical outcomes of patients with hypertension: death

Supplementary figure 4. Meta-analysis of the clinical outcomes of patients with hypertension: fatal outcomes

Supplementary figure 5. Risk difference of fatal outcome in patients with hypertension

Supplementary figure 6. Meta-analysis of the prevalence of diabetes

Supplementary figure 7. Meta-analysis of the clinical outcomes of patients with diabetes: severe COVID-19

Supplementary figure 8. Meta-analysis of the clinical outcomes of patients with diabetes: death

Supplementary figure 9. Meta-analysis of the clinical outcomes of patients with diabetes: fatal outcomes

Supplementary figure 10. Risk difference of fatal outcome in patients with diabetes

Supplementary figure 11. Meta-analysis of the prevalence of CVD

Supplementary figure 12. Meta-analysis of the clinical outcomes of patients with CVD: severe COVID-19

Supplementary figure 13. Meta-analysis of the clinical outcomes of patients with CVD: death

Supplementary figure 14. Meta-analysis of the clinical outcomes of patients with CVD: fatal outcomes

Supplementary figure 15. Risk difference of fatal outcome in patients with CVD

Supplementary figure 16. Contour-enhanced funnel plot

Reference

**Supplementary table 1. Search strategy**

|        | <b>Searches</b>                                                                                                                                                                                                                                                                                                                                                                                                                          | <b>Results (June 11,2020)</b> |
|--------|------------------------------------------------------------------------------------------------------------------------------------------------------------------------------------------------------------------------------------------------------------------------------------------------------------------------------------------------------------------------------------------------------------------------------------------|-------------------------------|
| Pubmed | [(COVID-19) OR (coronavirus) OR (SARS-CoV-2)] AND [(observational) OR (characteristic) OR (comorbidity) OR (factors) OR (hypertension) OR (mortality) OR (HTN) OR (diabetes) OR (DM) OR (cardiovascular disease) OR (CVD)]                                                                                                                                                                                                               | 4,856                         |
| Embase | ('covid 19'/exp OR 'covid 19' OR 'coronavirus'/exp OR coronavirus OR 'sars cov 2') AND (observational OR characteristic OR 'comorbidity'/exp OR comorbidity OR factors OR 'hypertension'/exp OR hypertension OR 'mortality'/exp OR mortality OR htn OR 'diabetes'/exp OR diabetes OR dm OR 'cardiovascular disease'/exp OR 'cardiovascular disease' OR (('cardiovascular'/exp OR cardiovascular) AND ('disease'/exp OR disease)) OR cvd) | 5,022                         |

**Supplementary table 2. Baseline patient characteristics**

| Author                           | Dates, dd.mm.yy   | Study design                              | Setting                                                                     | Country | Patients group                   | Number | Age            | Male  | HTN | DM   | CVD  | Outcome                                                | NOS (0~8) |
|----------------------------------|-------------------|-------------------------------------------|-----------------------------------------------------------------------------|---------|----------------------------------|--------|----------------|-------|-----|------|------|--------------------------------------------------------|-----------|
| Argenziano et al. <sup>1</sup>   | 01.03.20-05.04.20 | Retrospective single-center observational | New York-Presbyterian / Columbia University Irving Medical Center, New York | USA     | In-hospital based (Case series)  | 850    | 63 (50-75)     | 511   | 525 | 333  | 115  | Severe COVID-19: need ICU care                         | 7         |
| Ashraf et al. <sup>2</sup>       | 22.02.20-03.05.20 | Retrospective single-center observational | Tehran University of Medical Sciences, Tehran                               | Iran    | In-hospital based (Case series)  | 100    | 58 (48-68)     | 64    | 26  | 26   | 19   | Severe COVID-19: need ICU care                         | 4         |
| Bhargava A et al. <sup>3</sup>   | 08.03.20-08.04.20 | Retrospective single-center observational | Ascension St John Hospital, Michigan                                        | USA     | In-hospital based (Case series)  | 197    | 60.6 ± 16.2    | 103   | 138 | 73   | 29   | Severe COVID-19: respiratory distress                  | 5         |
| Bode B et al. <sup>4</sup>       | 01.03.20-04.06.20 | Retrospective single-center observational | 88 U.S. hospitals                                                           | USA     | In-hospital based (Case series)  | 1122   | 62.6           | 624   |     | 451  |      | Death                                                  | 5         |
| Chen M et al. <sup>5</sup>       | 01.01.20-15.02.20 | Retrospective single-center observational | No. 7 Hospital, Hubei                                                       | China   | In-hospital based (Case series)  | 123    | 57.8           | 61    | 41  | 14   | 15   | Death                                                  | 6         |
| Chen Q et al. <sup>6</sup>       | 01.01.20-11.03.20 | Retrospective single-center observational | Taizhou Public Health Medical Center, Zhejiang                              | China   | In-hospital based (Case series)  | 145    | 47.5 ± 14.6    | 79    | 22  | 14   | 1    | Severe COVID-19: respiratory distress                  | 7         |
| Chen T et al. <sup>7</sup>       | 13.01.20-12.02.20 | Retrospective single-center observational | Tongji Hospital, Hubei                                                      | China   | In-hospital based (Case series)  | 274    | 62 (44.0-70.0) | 171   | 93  | 47   | 23   | Death                                                  | 6         |
| Chen X et al. <sup>8</sup>       | 23.01.20-14.02.20 | Retrospective multi-center observational  | First Hospital of Changsha and Loudi Central Hospital, Hunan                | China   | In-hospital based (Case series)  | 291    | 46 (34-59)     | 145   | 39  | 22   | 12   | Severe COVID-19: respiratory distress or need ICU care | 7         |
| Covino M et al. <sup>9</sup>     | 01.03.20-31.03.20 | Retrospective single-center observational | Agostino Gemelli University Policlinic, Rome                                | Italy   | In-hospital based (Case series)  | 69     | 84 (82-89)     | 37    | 41  | 9    | 21   | Death                                                  | 5         |
| Docherty AB et al. <sup>10</sup> | 06.02.20-19.04.20 | Prospective multi-center observational    | 208 acute care hospitals in England, Scotland, and Wales                    | UK      | In-hospital based (Cohort study) | 20133  | 72.9 (58-82)   | 12068 |     | 4949 | 5469 | Death                                                  | 7         |
| Du R et al. <sup>11</sup>        | 25.12.19-07.02.20 | Prospective single-center observational   | Wuhan Pulmonary Hospital, Hubei                                             | China   | In-hospital based (Cohort study) | 179    | 57.6 ± 13.7    | 97    | 58  | 33   | 29   | Death                                                  | 6         |
| Feng X et al. <sup>12</sup>      | 23.01.20-22.02.20 | Prospective single-center observational   | Wuhan Union Hospital, Hubei                                                 | China   | In-hospital based (Cohort study) | 114    | 63.96 ± 13.4   | 71    | 62  | 39   | 31   | Severe COVID-19: respiratory distress                  | 6         |
| Feng Z et al. <sup>13</sup>      | 17.01.20-         | Retrospective                             | Third Xiangya Hospital                                                      | China   | In-hospital                      | 141    | 44             | 72    | 21  | 8    | 3    | Severe COVID-19:                                       | 7         |

|                                  |                   |                                           |                                                                  |       |                                  |       |                  |      |     |     |     |                                                        |   |
|----------------------------------|-------------------|-------------------------------------------|------------------------------------------------------------------|-------|----------------------------------|-------|------------------|------|-----|-----|-----|--------------------------------------------------------|---|
|                                  | 01.02.20          | single-center observational               | of Central South University, Hunan                               |       | based (Case series)              |       | (34-55)          |      |     |     |     | respiratory distress or need ICU care                  |   |
| Fu L et al. <sup>14</sup>        | 01.01.20-30.01.20 | Retrospective single-center observational | Union Hospital of Huazhong University, Hubei                     | China | In-hospital based (Case series)  | 200   | 58.2 ±12.3       | 99   | 101 | 137 | 16  | Death                                                  | 5 |
| Gao C et al. <sup>15</sup>       | 05.02.20-15.03.20 | Retrospective single-center observational | Huo Shen Shan Hospital, Hubei                                    | China | In-hospital based (Case series)  | 2877  | 57.9             | 1470 | 850 | 387 | 221 | Severe COVID-19: respiratory distress or need ICU care | 7 |
| Guan W et al. <sup>16</sup>      | 11.12.19-31.01.20 | Retrospective multi-center observational  | 575 hospitals                                                    | China | In-hospital based (Case series)  | 1590  | 48.9 ±16.3       | 904  | 269 | 130 | 59  | Death                                                  | 7 |
| Guan WJ et al. <sup>17</sup>     | 12.11.19-31.01.20 | Prospective multi-center observational    | 552 hospitals in 30 provinces in mainland                        | China | In-hospital based (Cohort study) | 1,099 | 47.0 (35-58)     | 637  | 165 | 81  | 27  | Severe COVID-19: need ICU care                         | 7 |
| Grasselli G et al. <sup>18</sup> | 20.02.20-18.03.20 | Retrospective multi-center observational  | Fondazione IRCCS Ca' Granda Ospedale Maggiore Policlinico, Milan | Italy | In-hospital based (Case series)  | 203   | <50              | 166  | 25  | 5   | 5   | Death                                                  | 7 |
|                                  |                   |                                           |                                                                  |       |                                  | 427   | 50-60            | 355  | 121 | 40  | 43  |                                                        |   |
|                                  |                   |                                           |                                                                  |       |                                  | 961   | >60              | 783  | 363 | 135 | 175 |                                                        |   |
| Hou W et al. <sup>19</sup>       | 21.01.20-09.03.20 | Retrospective single-center observational | Beijing You'an Hospital, Capital Medical University, Beijing     | China | In-hospital based (Cohort study) | 101   | 50.9 ± 20.1      | 44   | 21  | 6   | 11  | Severe COVID-19: need ICU care                         | 7 |
| Hu L et al. <sup>20</sup>        | 08.01.20-20.02.20 | Retrospective single-center observational | Tianyou Hospital, Shanghai                                       | China | In-hospital based (Case series)  | 323   | 61 (23-91)       | 166  | 105 | 47  | 34  | Severe COVID-19: respiratory distress or need ICU care | 7 |
| Huang J et al. <sup>21</sup>     | 25.01.20-24.03.20 | Retrospective single-center observational | Third People's Hospital of Yichang, Hubei                        | China | In-hospital based (Cohort study) | 344   | 52.9 ± 16.8      | 188  | 78  | 38  | 18  | Severe COVID-19: respiratory distress                  | 7 |
| Huang C et al. <sup>22</sup>     | 16.12.19-02.01.20 | Prospective single-center observational   | JinYintan Hospital, Hubei                                        | China | In-hospital based (Case series)  | 41    | 49.0 (41.0-58.0) | 30   | 6   | 8   | 6   | Severe COVID-19: need ICU care                         | 7 |
| Hur K et al. <sup>23</sup>       | 01.03.20-08.04.20 | Retrospective single-center observational | Northwestern-affiliated health care centers, Chicago             | USA   | In-hospital based (Case series)  | 486   | 59               | 271  | 267 | 160 | 111 | Severe COVID-19: need ICU care                         | 6 |
| Jiang et al. <sup>24</sup>       | 23.01.20-16.02-20 | Retrospective single-center observational | Wuxi Fifth People's Hospital, Jiangsu                            | China | In-hospital based (Case series)  | 55    | 45 (27-60)       | 27   | 17  | 9   | 3   | Severe COVID-19: respiratory distress                  | 5 |
| Li Q et al. <sup>25</sup>        | 20.01.20-29.02.20 | Retrospective single-center observational | Shanghai Public Health Clinical Center, Shanghai                 | China | In-hospital based (Case series)  | 325   | 51 (36-64)       | 167  | 78  | 30  | 18  | Severe COVID-19: respiratory distress or need ICU care | 7 |
| Liu J et al. <sup>26</sup>       | 13.01.20-31.01.20 | Prospective single-center observational   | Beijing Ditan Hospital, Beijing                                  | China | In-hospital based (Case series)  | 61    | 40 (1-86)        | 31   | 12  | 5   | 1   | Severe COVID-19: need ICU care                         | 7 |

|                                      |                   |                                           |                                                                                                         |       |                                  |      |                |       |       |       |     |                                                        |   |
|--------------------------------------|-------------------|-------------------------------------------|---------------------------------------------------------------------------------------------------------|-------|----------------------------------|------|----------------|-------|-------|-------|-----|--------------------------------------------------------|---|
| Liu W et al. <sup>27</sup>           | 30.12.19-01.15.20 | Retrospective multi-center observational  | Three tertiary hospitals, Hubei                                                                         | China | In-hospital based (Case series)  | 78   | 38.0 (33-57)   | 39    | 8     | 5     |     | Severe COVID-19: respiratory distress or need ICU care | 5 |
| Luo X et al. <sup>28</sup>           | 30.01.20-25.02.20 | Retrospective single-center observational | Renmin Hospital of Wuhan university, Hubei                                                              | China | In-hospital based (Case series)  | 403  | 56 (39-68)     | 193   | 113   | 57    | 36  | Death                                                  | 6 |
| Ma KL et al. <sup>29</sup>           | 21.01.20-02.03.20 | Retrospective single-center observational | Yongchuan Hospital of Chongqing Medical University, Chongqing                                           | China | In-hospital based (Cohort study) | 84   | 48 (42.3-62.5) | 48    | 12    | 10    | 5   | Severe COVID-19: respiratory distress                  | 7 |
| Nikpouraghdam M et al. <sup>30</sup> | 19.02.20-15.04.20 | Retrospective single-center observational | Baqiyatallah Hospital, Tehran                                                                           | Iran  | In-hospital based (Case series)  | 2964 | 56 (46-65)     | 1955  | 59    | 113   | 37  | Death                                                  | 7 |
| Petrilli et al. <sup>31</sup>        | 01.03.20-08.04.20 | Prospective multi-center observational    | NYU Langone Health, New York                                                                            | USA   | In-hospital only (Cohort study)  | 2729 | 63 (51-74)     | 1672  | 1693  | 950   | 602 | Severe COVID-19: need ICU care                         | 7 |
| Qi D et al. <sup>32</sup>            | 19.01.20-16.02.20 | Retrospective multi-center observational  | Qianjiang central, Chongqing three gorges central and Chongqing public health medical center, Chongqing | China | In-hospital based (Case series)  | 267  | 48 (20-80)     | 149   | 20    | 26    | 13  | Severe COVID-19: respiratory distress or need ICU care | 6 |
| Richardson et al. <sup>33</sup>      | 03.04.20-04.04.20 | Retrospective multi-center observational  | 12 hospitals within the Northwell Health system, New York                                               | USA   | In-hospital based (Case series)  | 5700 | 63 (52-75)     | 3,437 | 3,026 | 1,808 | 595 | Death                                                  | 7 |
| Rossi et al. <sup>34</sup>           | 27.02.20-02.04.20 | Prospective multi-center observational    | Province of Reggio Emilia                                                                               | Italy | In-hospital only (Cohort study)  | 1075 | 70.4 ±15.1     | 657   | 280   | 185   | 115 | Death                                                  | 7 |
| Russo V et al. <sup>35</sup>         | 01.02.20-31.04.20 | Retrospective single-center observational | Five Italian Hospitals                                                                                  | Italy | In-hospital based (Case series)  | 192  | 67.7           | 115   | 111   | 42    | 26  | Death                                                  | 6 |
| Shang W et al. <sup>36</sup>         | 16.01.28-28.02.20 | Retrospective single-center observational | Wuhan Forth Hospital, Hubei                                                                             | China | In-hospital based (Case series)  | 443  | 56 (43-66)     | 220   | 131   | 63    | 44  | Severe COVID-19: respiratory distress or need ICU care | 6 |
| Shi Y et al. <sup>37</sup>           | 01.01.20-17.02.20 | Retrospective multi-center observational  | Zhejiang Province of China                                                                              | China | In-hospital based (Case series)  | 487  | 46 ±18.0       | 259   | 99    | 29    | 11  | Severe COVID-19: respiratory distress                  | 7 |
| Wan S et al. <sup>38</sup>           | 23.01.20-08.02.20 | Retrospective single-center observational | Chongqing University Three Gorges Hospital, Chongqing                                                   | China | In-hospital based (Case series)  | 135  | 47 (36-55)     | 73    | 13    | 12    | 7   | Severe COVID-19: respiratory distress or need ICU care | 7 |
| Wang K et al. <sup>39</sup>          | 26.01.20-05.02.20 | Retrospective single-center observational | Huazhong University of Science and Technology, Hubei                                                    | China | In-hospital based (Case series)  | 548  | 60.2           | 279   | 166   | 83    | 34  | Death                                                  | 5 |
| Wang L et al. <sup>40</sup>          | 01.01.20-         | Retrospective                             | Renmin Hospital of                                                                                      | China | In-hospital                      | 339  | 69             | 166   | 138   | 54    | 53  | Death                                                  | 5 |

|                               |                   |                                           |                                                                              |       |                                  |      |                |      |     |     |    |                                                        |   |
|-------------------------------|-------------------|-------------------------------------------|------------------------------------------------------------------------------|-------|----------------------------------|------|----------------|------|-----|-----|----|--------------------------------------------------------|---|
|                               | 06.02.20          | single-center observational               | Wuhan university, Hubei                                                      |       | based (Case series)              |      | (65-76)        |      |     |     |    |                                                        |   |
| Wang X et al. <sup>41</sup>   | 03.02.20-21.02.20 | Prospective single-center observational   | Tongji Hospital, Hubei                                                       | China | In-hospital based (Cohort study) | 131  | 49 (36-62)     | 59   | 4   | 2   | 3  | Severe COVID-19: respiratory distress                  | 7 |
| Wang Y et al. <sup>42</sup>   | 01.01.20-01.02.20 | Retrospective single-center observational | Central Hospital of Wuhan, Hubei                                             | China | In-hospital based (Case series)  | 110  | 46.9 ±17.6     | 48   | 23  | 15  |    | Severe COVID-19: respiratory distress                  | 6 |
| Wang D et al. <sup>43</sup>   | 01.01.20-28.01.20 | Retrospective single-center observational | Zhongnan Hospital of Wuhan University, Hubei                                 | China | In-hospital based (Case series)  | 138  | 56.0 (42-68)   | 75   | 43  | 14  | 20 | Severe COVID-19: need ICU care                         | 6 |
| Wang Z et al. <sup>44</sup>   | 16.01.20-29.01.20 | Retrospective single-center observational | Wuhan Union Hospital, Hubei                                                  | China | In-hospital based (Case series)  | 69   | 42.0 (35-62)   | 32   | 9   | 7   | 8  | Severe COVID-19: respiratory distress                  | 6 |
| Xu B et al. <sup>45</sup>     | 26.12.19-01.03.20 | Retrospective single-center observational | Hubei Provincial Hospital of traditional Chinese and Western medicine, Hubei | China | In-hospital based (Case series)  | 187  | 62 (48.5-71)   | 103  | 50  |     | 19 | Death                                                  | 7 |
| Xu PP et al. <sup>46</sup>    | 10.01.20-13.03.20 | Retrospective multi-center observational  | 16 tertiary hospitals                                                        | China | In-hospital based (Case series)  | 703  | 46.1 ± 15.2    | 382  | 118 | 64  | 45 | Death                                                  | 7 |
| Yadaw AS et al. <sup>47</sup> | -06.04.20         | Prospective multi-center observational    | Mount Sinai Hospital, New York                                               | USA   | In-hospital based (Cohort study) | 3841 | 56.2 ± 19.0    | 2125 | 869 | 608 |    | Death                                                  | 7 |
| Yang P et al. <sup>48</sup>   | 01.01.20-31.03.20 | Retrospective single-center observational | Chongqing Public Health Medical Center, Chongqing                            | China | In-hospital based (Cohort study) | 133  | 49.2           | 72   | 16  | 22  | 6  | Severe COVID-19: respiratory distress or need ICU care | 5 |
| Yuan B et al. <sup>49</sup>   | -07.03.20         | Retrospective multi-center observational  | Shenzhen Municipal Health Commission, Shenzhen                               | China | In-hospital based (Case series)  | 417  | 45.4 ±17.7     | 198  | 63  | 32  | 28 | Severe COVID-19: respiratory distress or need ICU care | 7 |
| Zhou F et al. <sup>50</sup>   | 29.12.19-01.31.20 | Retrospective multi-center observational  | Two tertiary hospitals, Hubei                                                | China | In-hospital based (Cohort study) | 191  | 56 (46.0-67.0) | 119  | 58  | 36  | 15 | Death                                                  | 7 |
| Zhu Z et al. <sup>51</sup>    | 23.01.20-20.02.20 | Retrospective single-center observational | Hwa Mei Hospital, Zhengzhou                                                  | China | In-hospital based (Case series)  | 127  | 50.9 ± 15.3    | 45   | 31  | 10  | 6  | Severe COVID-19: respiratory distress or need ICU care | 6 |

**Supplementary table 3. Small-study effect or publication bias**

|                               | N studies | Pooled effect size<br>(95% CI) | Egger's test | Begg's test | * Trim and fill analysis |
|-------------------------------|-----------|--------------------------------|--------------|-------------|--------------------------|
| <b>Hypertension</b>           |           |                                |              |             |                          |
| < 50 years                    | 20        | 3.49 (2.49 – 4.88)             | 0.5192       | 0.1734      |                          |
| 50 ~ 60 years                 | 17        | 2.61 (2.03 – 3.37)             | 0.1384       | 0.2165      |                          |
| ≥ 60 years                    | 14        | 1.86 (1.55 – 2.23)             | 0.6491       | 0.2503      |                          |
| Total                         | 51        | 2.50 (2.15 – 2.90)             | 0.0303       | 0.5317      | 0.9239                   |
| <b>Diabetes</b>               |           |                                |              |             |                          |
| < 50 years                    | 19        | 3.49 (2.24 – 5.45)             | 0.4915       | 0.7529      |                          |
| 50 ~ 60 years                 | 15        | 2.37 (1.83 – 3.08)             | 0.9648       | 0.9605      |                          |
| ≥ 60 years                    | 14        | 1.65 (1.34 – 2.03)             | 0.1669       | 0.4115      |                          |
| Total                         | 48        | 2.25 (1.89 – 2.69)             | <0.001       | 0.9151      | 0.4055                   |
| <b>Cardiovascular disease</b> |           |                                |              |             |                          |
| < 50 years                    | 17        | 5.79 (4.32 – 7.78)             | 0.7419       | 0.9343      |                          |
| 50 ~ 60 years                 | 15        | 2.96 (2.08 – 4.22)             | 0.6373       | 0.6222      |                          |
| ≥ 60 years                    | 13        | 1.80 (1.51 – 2.15)             | 0.4866       | 0.2721      |                          |
| Total                         | 45        | 2.85 (2.37 – 3.43)             | 0.0001       | 0.7462      | 0.6611                   |

\*Where publication bias was significant, trim and fill analyses were performed using the Duval and Tweedie non-parametric method.

**Supplementary table 4. Sensitivity analysis based on study size**

| Subgroup                          | Total study number | N      | OR (95% CI)        | p      |
|-----------------------------------|--------------------|--------|--------------------|--------|
| <b>Hypertension</b>               |                    |        |                    |        |
| Fatal outcome                     |                    |        |                    |        |
| Large size ( $\geq 400$ patients) |                    |        |                    |        |
| < 50 years                        | 5                  | 4,285  | 4.01 (2.08 – 7.72) | <0.001 |
| 50~60 years                       | 6                  | 11,014 | 2.16 (1.44 – 3.24) | <0.001 |
| $\geq 60$ years                   | 6                  | 8,485  | 1.96 (1.57 – 2.46) | <0.001 |
| Total                             | 17                 | 23,784 | 2.41 (1.95 – 2.98) | <0.001 |
| Small size (<400 patients)        |                    |        |                    |        |
| < 50 years                        | 15                 | 1,858  | 3.29 (2.25 – 4.82) | <0.001 |
| 50~60 years                       | 11                 | 2,097  | 2.30 (2.35 – 3.83) | <0.001 |
| $\geq 60$ years                   | 8                  | 1,695  | 1.66 (1.17 – 2.35) | 0.0041 |
| Total                             | 34                 | 5,650  | 2.59 (2.09 – 3.20) | <0.001 |
| <b>Diabetes</b>                   |                    |        |                    |        |
| Fatal outcome                     |                    |        |                    |        |
| Large size ( $\geq 400$ patients) |                    |        |                    |        |
| < 50 years                        | 5                  | 4,285  | 3.57 (1.76 – 7.22) | 0.0004 |
| 50~60 years                       | 5                  | 8,137  | 1.98 (1.37 – 2.85) | 0.0003 |
| $\geq 60$ years                   | 7                  | 26,005 | 1.75 (1.35 – 2.27) | <0.001 |
| Total                             | 17                 | 38,427 | 2.15 (1.71 – 2.70) | <0.001 |
| Small size (<400 patients)        |                    |        |                    |        |
| < 50 years                        | 14                 | 1,740  | 3.49 (1.90 – 6.44) | <0.001 |
| 50~60 years                       | 10                 | 1,828  | 2.96 (2.07 – 2.24) | <0.001 |
| $\geq 60$ years                   | 7                  | 1,508  | 1.47 (1.03 – 2.09) | 0.0321 |
| Total                             | 31                 | 5,077  | 2.39 (1.79 – 3.19) | <0.001 |
| <b>Cardiovascular disease</b>     |                    |        |                    |        |
| Fatal outcome                     |                    |        |                    |        |
| Large size ( $\geq 400$ patients) |                    |        |                    |        |
| < 50 years                        | 5                  | 4,285  | 6.61 (4.46 – 9.80) | <0.001 |
| 50~60 years                       | 4                  | 4,296  | 2.52 (1.83 – 3.46) | <0.001 |
| $\geq 60$ years                   | 5                  | 22,904 | 1.77 (1.39 – 2.26) | <0.001 |
| Total                             | 14                 | 31,485 | 2.65 (2.06 – 3.39) | <0.001 |
| Small size (<400 patients)        |                    |        |                    |        |
| < 50 years                        | 12                 | 1,553  | 4.22 (2.45 – 7.26) | <0.001 |
| 50~60 years                       | 10                 | 1,828  | 3.92 (1.98 – 7.75) | <0.001 |
| $\geq 60$ years                   | 8                  | 1,695  | 2.83 (1.88 – 4.28) | <0.001 |
| Total                             | 30                 | 5,076  | 3.58 (2.64 – 4.87) | <0.001 |



**Supplementary table 5. Sensitivity analysis performed by omitting individual studies: hypertension and clinical outcomes**

| Study omitted          | Total              | < 50 years         | 50–60 years        | ≥ 60 years         |
|------------------------|--------------------|--------------------|--------------------|--------------------|
|                        | OR (95% CI)        | OR (95% CI)        | OR (95% CI)        | OR (95% CI)        |
| Argenziano et al.      | 2.55 (2.19 – 2.97) | 3.49 (2.49 – 4.88) | 2.61 (2.03 – 3.37) | 1.93 (1.59 – 2.33) |
| Ashraf et al.          | 2.50 (2.14 – 2.90) | 3.49 (2.49 – 4.88) | 2.60 (2.01 – 3.38) | 1.86 (1.55 – 2.23) |
| Bhargava A et al.      | 2.53 (2.17 – 2.94) | 3.49 (2.49 – 4.88) | 2.61 (2.03 – 3.37) | 1.87 (1.55 – 2.27) |
| Chen M et al.          | 2.50 (2.15 – 2.91) | 3.49 (2.49 – 4.88) | 2.63 (2.02 – 3.43) | 1.86 (1.55 – 2.23) |
| Chen Q et al.          | 2.51 (2.16 – 2.92) | 3.62 (2.56 – 5.12) | 2.61 (2.03 – 3.37) | 1.86 (1.55 – 2.23) |
| Chen T et al.          | 2.49 (2.14 – 2.90) | 3.49 (2.49 – 4.88) | 2.61 (2.03 – 3.37) | 1.80 (1.49 – 2.18) |
| Chen X et al.          | 2.44 (2.11 – 2.84) | 3.32 (2.34 – 4.71) | 2.61 (2.03 – 3.37) | 1.86 (1.55 – 2.23) |
| Covino M et al.        | 2.56 (2.21 – 2.96) | 3.49 (2.49 – 4.88) | 2.61 (2.03 – 3.37) | 1.94 (1.65 – 2.28) |
| Du R et al.            | 2.48 (2.13 – 2.88) | 3.49 (2.49 – 4.88) | 2.56 (1.98 – 3.33) | 1.86 (1.55 – 2.23) |
| Feng X et al.          | 2.52 (2.17 – 2.93) | 3.49 (2.49 – 4.88) | 2.61 (2.03 – 3.37) | 1.88 (1.55 – 2.26) |
| Feng Z et al.          | 2.48 (2.13 – 2.88) | 3.42 (2.41 – 4.85) | 2.61 (2.03 – 3.37) | 1.86 (1.55 – 2.23) |
| Fu L et al.            | 2.51 (2.16 – 2.92) | 3.49 (2.49 – 4.88) | 2.61 (2.03 – 3.37) | 1.86 (1.55 – 2.23) |
| Gao C et al.           | 2.53 (2.16 – 2.97) | 3.49 (2.49 – 4.88) | 2.73 (2.04 – 3.66) | 1.86 (1.55 – 2.23) |
| Grasselli G et al.     | 2.55 (2.18 – 2.99) | 3.51 (2.48 – 4.98) | 2.71 (2.08 – 3.54) | 1.84 (1.50 – 2.26) |
| Guan W et al.          | 2.43 (2.10 – 2.81) | 3.30 (2.33 – 4.66) | 2.61 (2.03 – 3.37) | 1.86 (1.55 – 2.23) |
| Guan WJ et al.         | 2.48 (2.13 – 2.88) | 3.46 (2.39 – 5.00) | 2.61 (2.03 – 3.37) | 1.86 (1.55 – 2.23) |
| Hou W et al.           | 2.48 (2.13 – 2.88) | 3.49 (2.49 – 4.88) | 2.56 (1.98 – 3.31) | 1.86 (1.55 – 2.23) |
| Hu L et al.            | 2.52 (2.16 – 2.94) | 3.49 (2.49 – 4.88) | 2.61 (2.03 – 3.37) | 1.86 (1.53 – 2.26) |
| Huang J et al.         | 2.48 (2.13 – 2.89) | 3.49 (2.49 – 4.88) | 2.58 (1.98 – 3.36) | 1.86 (1.55 – 2.23) |
| Huang C et al.         | 2.51 (2.16 – 2.92) | 3.59 (2.56 – 5.04) | 2.61 (2.03 – 3.37) | 1.86 (1.55 – 2.23) |
| Hur K et al.           | 2.55 (2.19 – 2.97) | 3.49 (2.49 – 4.88) | 2.78 (2.14 – 3.60) | 1.86 (1.55 – 2.23) |
| Jiang et al.           | 2.51 (2.16 – 2.92) | 3.59 (2.55 – 5.05) | 2.61 (2.03 – 3.37) | 1.86 (1.55 – 2.23) |
| Li Q et al.            | 2.47 (2.12 – 2.87) | 3.49 (2.49 – 4.88) | 2.53 (1.96 – 3.28) | 1.86 (1.55 – 2.23) |
| Liu J et al.           | 2.49 (2.14 – 2.90) | 3.48 (2.45 – 4.93) | 2.61 (2.03 – 3.37) | 1.86 (1.55 – 2.23) |
| Liu W et al.           | 2.50 (2.15 – 2.91) | 3.52 (2.49 – 4.97) | 2.61 (2.03 – 3.37) | 1.86 (1.55 – 2.23) |
| Luo X et al.           | 2.42 (2.09 – 2.79) | 3.49 (2.49 – 4.88) | 2.35 (1.88 – 2.93) | 1.86 (1.55 – 2.23) |
| Ma KL et al.           | 2.51 (2.16 – 2.92) | 3.58 (2.54 – 5.06) | 2.61 (2.03 – 3.37) | 1.86 (1.55 – 2.23) |
| Nikpouraghdam M et al. | 2.52 (2.16 – 2.93) | 3.49 (2.49 – 4.88) | 2.67 (2.05 – 3.49) | 1.86 (1.55 – 2.23) |
| Petrilli et al.        | 2.54 (2.18 – 2.97) | 3.49 (2.49 – 4.88) | 2.61 (2.03 – 3.37) | 1.90 (1.56 – 2.32) |
| Qi Di et al.           | 2.44 (2.11 – 2.83) | 3.29 (2.35 – 4.60) | 2.61 (2.03 – 3.37) | 1.86 (1.55 – 2.23) |
| Richardson et al.      | 2.50 (2.14 – 2.93) | 3.49 (2.49 – 4.88) | 2.61 (2.03 – 3.37) | 1.78 (1.49 – 2.13) |
| Rossi et al.           | 2.51 (2.15 – 2.93) | 3.49 (2.49 – 4.88) | 2.61 (2.03 – 3.37) | 1.81 (1.48 – 2.21) |
| Russo V et al.         | 2.49 (2.14 – 2.90) | 3.49 (2.49 – 4.88) | 2.61 (2.03 – 3.37) | 1.83 (1.51 – 2.20) |
| Shang W et al.         | 2.55 (2.19 – 2.97) | 3.49 (2.49 – 4.88) | 2.78 (2.15 – 3.60) | 1.86 (1.55 – 2.23) |
| Shi Y et al.           | 2.45 (2.11 – 2.84) | 3.34 (2.34 – 4.78) | 2.61 (2.03 – 3.37) | 1.86 (1.55 – 2.23) |
| Wan S et al.           | 2.52 (2.17 – 2.93) | 3.68 (2.63 – 5.15) | 2.61 (2.03 – 3.37) | 1.86 (1.55 – 2.23) |
| Wang K et al.          | 2.50 (2.14 – 2.91) | 3.49 (2.49 – 4.88) | 2.61 (2.03 – 3.37) | 1.81 (1.50 – 2.20) |
| Wang L et al.          | 2.53 (2.17 – 2.95) | 3.49 (2.49 – 4.88) | 2.61 (2.03 – 3.37) | 1.88 (1.55 – 2.28) |
| Wang X et al.          | 2.50 (2.15 – 2.90) | 3.49 (2.48 – 4.93) | 2.61 (2.03 – 3.37) | 1.86 (1.55 – 2.23) |
| Wang Y et al.          | 2.47 (2.13 – 2.87) | 3.40 (2.39 – 4.83) | 2.61 (2.03 – 3.37) | 1.86 (1.55 – 2.23) |
| Wang D et al.          | 2.46 (2.12 – 2.87) | 3.49 (2.49 – 4.88) | 2.52 (1.95 – 3.26) | 1.86 (1.55 – 2.23) |
| Wang Z et al.          | 2.48 (2.13 – 2.88) | 3.40 (2.41 – 4.80) | 2.61 (2.03 – 3.37) | 1.86 (1.55 – 2.23) |
| Xu B et al.            | 2.52 (2.16 – 2.93) | 3.49 (2.49 – 4.88) | 2.61 (2.03 – 3.37) | 1.86 (1.54 – 2.25) |
| Xu PP et al.           | 2.45 (2.11 – 2.84) | 3.33 (2.35 – 4.72) | 2.61 (2.03 – 3.37) | 1.86 (1.55 – 2.23) |
| Yadaw AS et al.        | 2.49 (2.13 – 2.91) | 3.49 (2.49 – 4.88) | 2.63 (1.97 – 3.50) | 1.86 (1.55 – 2.23) |
| Yang P et al.          | 2.50 (2.15 – 2.91) | 3.55 (2.50 – 5.04) | 2.61 (2.03 – 3.37) | 1.86 (1.55 – 2.23) |
| Yuan B et al.          | 2.54 (2.19 – 2.96) | 4.01 (3.03 – 5.33) | 2.61 (2.03 – 3.37) | 1.86 (1.55 – 2.23) |
| Zhou F et al.          | 2.49 (2.14 – 2.90) | 3.49 (2.49 – 4.88) | 2.59 (1.99 – 3.38) | 1.86 (1.55 – 2.23) |
| Zhu Z et al.           | 2.48 (2.14 – 2.89) | 3.49 (2.49 – 4.88) | 2.58 (1.99 – 3.35) | 1.86 (1.55 – 2.23) |

**Supplementary table 6. Sensitivity analysis performed by omitting individual studies: diabetes and clinical outcomes**

| Study omitted          | Total              | < 50 years         | 50–60 years        | ≥ 60 years         |
|------------------------|--------------------|--------------------|--------------------|--------------------|
|                        | OR (95% CI)        | OR (95% CI)        | OR (95% CI)        | OR (95% CI)        |
| Argezoamp et al.       | 2.31 (1.92 – 2.78) | 3.49 (2.24 – 5.45) | 2.37 (1.83 – 3.08) | 1.70 (1.35 – 2.14) |
| Ashraf et al.          | 2.26 (1.89 – 2.70) | 3.49 (2.24 – 5.45) | 2.38 (1.81 – 3.13) | 1.65 (1.34 – 2.03) |
| Bhargava A et al.      | 2.26 (1.88 – 2.70) | 3.49 (2.24 – 5.45) | 2.37 (1.83 – 3.08) | 1.62 (1.30 – 2.00) |
| Bode B et al.          | 2.17 (1.83 – 2.58) | 3.49 (2.24 – 5.45) | 2.37 (1.83 – 3.08) | 1.49 (1.26 – 1.75) |
| Chen M et al.          | 2.25 (1.88 – 2.69) | 3.49 (2.24 – 5.45) | 2.37 (1.80 – 3.11) | 1.65 (1.34 – 2.03) |
| Chen Q et al.          | 2.25 (1.88 – 2.69) | 3.57 (2.23 – 5.71) | 2.37 (1.83 – 3.08) | 1.65 (1.34 – 2.03) |
| Chen T et al.          | 2.28 (1.90 – 2.73) | 3.49 (2.24 – 5.45) | 2.37 (1.83 – 3.08) | 1.65 (1.33 – 2.05) |
| Chen X et al.          | 2.28 (1.91 – 2.73) | 3.78 (2.43 – 5.88) | 2.37 (1.83 – 3.08) | 1.65 (1.34 – 2.03) |
| Covino M et al.        | 2.28 (1.91 – 2.73) | 3.49 (2.24 – 5.45) | 2.37 (1.83 – 3.08) | 1.67 (1.36 – 2.07) |
| Docherty AB et al.     | 2.32 (1.93 – 2.78) | 3.49 (2.24 – 5.45) | 2.37 (1.83 – 3.08) | 1.71 (1.35 – 2.18) |
| Du R et al.            | 2.26 (1.89 – 2.70) | 3.49 (2.24 – 5.45) | 2.40 (1.82 – 3.15) | 1.65 (1.34 – 2.03) |
| Feng X et al.          | 2.30 (1.93 – 2.75) | 3.49 (2.24 – 5.45) | 2.37 (1.83 – 3.08) | 1.70 (1.37 – 2.09) |
| Feng Z et al.          | 2.25 (1.88 – 2.69) | 3.52 (2.22 – 5.58) | 2.37 (1.83 – 3.08) | 1.65 (1.34 – 2.03) |
| Fu L et al.            | 2.27 (1.90 – 2.72) | 3.49 (2.24 – 5.45) | 2.43 (1.85 – 3.20) | 1.65 (1.34 – 2.03) |
| Guan W et al.          | 2.21 (1.85 – 2.64) | 3.45 (2.13 – 5.61) | 2.37 (1.83 – 3.08) | 1.65 (1.34 – 2.03) |
| Guan WJ et al.         | 2.19 (1.83 – 2.60) | 3.36 (2.09 – 5.39) | 2.37 (1.83 – 3.08) | 1.65 (1.34 – 2.03) |
| Hou W et al.           | 2.25 (1.89 – 2.69) | 3.49 (2.24 – 5.45) | 2.37 (1.81 – 3.10) | 1.65 (1.34 – 2.03) |
| Hu L et al.            | 2.25 (1.88 – 2.70) | 3.49 (2.24 – 5.45) | 2.37 (1.83 – 3.08) | 1.61 (1.30 – 2.00) |
| Huang J et al.         | 2.21 (1.85 – 2.65) | 3.49 (2.24 – 5.45) | 2.26 (1.74 – 2.94) | 1.65 (1.34 – 2.03) |
| Huang C et al.         | 2.28 (1.91 – 2.72) | 3.75 (2.43 – 5.78) | 2.37 (1.83 – 3.08) | 1.65 (1.34 – 2.03) |
| Hur K et al.           | 2.23 (1.87 – 2.67) | 3.49 (2.24 – 5.45) | 2.32 (1.73 – 3.11) | 1.65 (1.34 – 2.03) |
| Jiang et al.           | 2.23 (1.86 – 2.66) | 3.37 (2.13 – 5.31) | 2.37 (1.83 – 3.08) | 1.65 (1.34 – 2.03) |
| Li Q et al.            | 2.20 (1.84 – 2.62) | 3.49 (2.24 – 5.45) | 2.22 (1.75 – 2.83) | 1.65 (1.34 – 2.03) |
| Liu J et al.           | 2.24 (1.88 – 2.68) | 3.47 (2.19 – 5.49) | 2.37 (1.83 – 3.08) | 1.65 (1.34 – 2.03) |
| Liu W et al.           | 2.24 (1.88 – 2.68) | 3.46 (2.19 – 5.47) | 2.37 (1.83 – 3.08) | 1.65 (1.34 – 2.03) |
| Luo X et al.           | 2.24 (1.87 – 2.68) | 3.49 (2.24 – 5.45) | 2.33 (1.75 – 3.10) | 1.65 (1.34 – 2.03) |
| Ma KL et al.           | 2.21 (1.85 – 2.64) | 3.30 (2.10 – 5.19) | 2.37 (1.83 – 3.08) | 1.65 (1.34 – 2.03) |
| Nikpouraghdam M et al. | 2.29 (1.91 – 2.75) | 3.49 (2.24 – 5.45) | 2.51 (1.94 – 3.26) | 1.65 (1.34 – 2.03) |
| Petrilli et al.        | 2.32 (1.91 – 2.81) | 3.49 (2.24 – 5.45) | 2.37 (1.83 – 3.08) | 1.69 (1.31 – 2.18) |
| Qi Di et al.           | 2.29 (1.92 – 2.75) | 3.82 (2.45 – 5.96) | 2.37 (1.83 – 3.08) | 1.65 (1.34 – 2.03) |
| Richardson et al.      | 2.28 (1.89 – 2.75) | 3.49 (2.24 – 5.45) | 2.37 (1.83 – 3.08) | 1.60 (1.29 – 2.00) |
| Rossi et al.           | 2.28 (1.90 – 2.74) | 3.49 (2.24 – 5.45) | 2.37 (1.83 – 3.08) | 1.65 (1.32 – 2.06) |
| Russo V et al.         | 2.28 (1.91 – 2.73) | 3.49 (2.24 – 5.45) | 2.37 (1.83 – 3.08) | 1.66 (1.34 – 2.07) |
| Shang W et al.         | 2.31 (1.93 – 2.77) | 3.49 (2.24 – 5.45) | 2.57 (2.05 – 3.22) | 1.65 (1.34 – 2.03) |
| Shi Y et al.           | 2.24 (1.87 – 2.68) | 3.53 (2.19 – 5.69) | 2.37 (1.83 – 3.08) | 1.65 (1.34 – 2.03) |
| Wan S et al.           | 2.21 (1.86 – 2.64) | 3.33 (2.11 – 5.25) | 2.37 (1.83 – 3.08) | 1.65 (1.34 – 2.03) |
| Wang K et al.          | 2.26 (1.89 – 2.71) | 3.49 (2.24 – 5.45) | 2.37 (1.83 – 3.08) | 1.62 (1.31 – 2.02) |
| Wang L et al.          | 2.30 (1.92 – 2.75) | 3.49 (2.24 – 5.45) | 2.37 (1.83 – 3.08) | 1.68 (1.36 – 2.09) |
| Wang X et al.          | 2.25 (1.88 – 2.69) | 3.48 (2.21 – 5.48) | 2.37 (1.83 – 3.08) | 1.65 (1.34 – 2.03) |
| Wang Y et al.          | 2.25 (1.88 – 2.69) | 3.58 (2.24 – 5.73) | 2.37 (1.83 – 3.08) | 1.65 (1.34 – 2.03) |
| Wang D et al.          | 2.23 (1.86 – 2.66) | 3.49 (2.24 – 5.45) | 2.31 (1.77 – 3.01) | 1.65 (1.34 – 2.03) |
| Wang Z et al.          | 2.22 (1.86 – 2.64) | 3.25 (2.10 – 5.03) | 2.37 (1.83 – 3.08) | 1.65 (1.34 – 2.03) |
| Xu PP et al.           | 2.19 (1.83 – 2.60) | 3.30 (2.08 – 5.22) | 2.37 (1.83 – 3.08) | 1.65 (1.34 – 2.03) |
| Yadaw AS et al.        | 2.25 (1.88 – 2.70) | 3.49 (2.24 – 5.45) | 2.39 (1.74 – 3.27) | 1.65 (1.34 – 2.03) |
| Yang P et al.          | 2.21 (1.85 – 2.64) | 3.33 (2.11 – 5.28) | 2.37 (1.83 – 3.08) | 1.65 (1.34 – 2.03) |
| Yuan B et al.          | 2.30 (1.92 – 2.76) | 3.85 (2.52 – 5.90) | 2.37 (1.83 – 3.08) | 1.65 (1.34 – 2.03) |
| Zhou F et al.          | 2.24 (1.87 – 2.68) | 3.49 (2.24 – 5.45) | 2.34 (1.77 – 3.09) | 1.65 (1.34 – 2.03) |
| Zhu Z et al.           | 2.27 (1.90 – 2.71) | 3.49 (2.24 – 5.45) | 2.41 (1.86 – 3.11) | 1.65 (1.34 – 2.03) |

**Supplementary table 7. Sensitivity analysis performed by omitting individual studies: CVD and clinical outcomes**

| Study omitted          | Total              | < 50 years         | 50–60 years        | ≥ 60 years         |
|------------------------|--------------------|--------------------|--------------------|--------------------|
|                        | OR (95% CI)        | OR (95% CI)        | OR (95% CI)        | OR (95% CI)        |
| Argezoamp et al.       | 3.28 (2.69 – 3.99) | 5.66 (4.12 – 7.79) | 3.30 (2.16 – 5.05) | 2.23 (1.85 – 2.71) |
| Ashraf et al.          | 3.14 (2.57 – 3.84) | 5.66 (4.12 – 7.79) | 3.30 (2.16 – 5.05) | 2.10 (1.68 – 2.61) |
| Bhargava A et al.      | 3.17 (2.59 – 3.88) | 5.66 (4.12 – 7.79) | 3.30 (2.16 – 5.05) | 2.13 (1.69 – 2.69) |
| Chen M et al.          | 3.09 (2.53 – 3.77) | 5.66 (4.12 – 7.79) | 3.24 (2.06 – 5.11) | 2.10 (1.68 – 2.61) |
| Chen Q et al.          | 3.10 (2.54 – 3.78) | 5.65 (4.10 – 7.78) | 3.30 (2.16 – 5.05) | 2.10 (1.68 – 2.61) |
| Chen T et al.          | 3.09 (2.53 – 3.78) | 5.66 (4.12 – 7.79) | 3.30 (2.16 – 5.05) | 2.04 (1.63 – 2.56) |
| Chen X et al.          | 3.10 (2.53 – 3.78) | 5.85 (4.20 – 8.14) | 3.30 (2.16 – 5.05) | 2.10 (1.68 – 2.61) |
| Covino M et al.        | 3.18 (2.61 – 3.89) | 5.66 (4.12 – 7.79) | 3.30 (2.16 – 5.05) | 2.15 (1.72 – 2.69) |
| Docherty AB et al.     | 3.30 (2.60 – 4.20) | 5.66 (4.12 – 7.79) | 3.30 (2.16 – 5.05) | 2.24 (1.63 – 3.09) |
| Du R et al.            | 2.99 (2.46 – 3.64) | 5.66 (4.12 – 7.79) | 2.99 (1.98 – 4.51) | 2.10 (1.68 – 2.61) |
| Feng X et al.          | 3.16 (2.58 – 3.86) | 5.66 (4.12 – 7.79) | 3.30 (2.16 – 5.05) | 2.13 (1.69 – 2.67) |
| Feng Z et al.          | 3.10 (2.54 – 3.78) | 5.69 (4.12 – 7.84) | 3.30 (2.16 – 5.05) | 2.10 (1.68 – 2.61) |
| Fu L et al.            | 3.20 (2.63 – 3.89) | 5.66 (4.12 – 7.79) | 3.69 (2.58 – 5.27) | 2.10 (1.68 – 2.61) |
| Guan W et al.          | 3.04 (2.49 – 3.71) | 5.68 (4.01 – 8.04) | 3.30 (2.16 – 5.05) | 2.10 (1.68 – 2.61) |
| Guan WJ et al.         | 3.07 (2.51 – 3.75) | 5.79 (4.13 – 8.13) | 3.30 (2.16 – 5.05) | 2.10 (1.68 – 2.61) |
| Hou W et al.           | 3.10 (2.54 – 3.79) | 5.66 (4.12 – 7.79) | 3.30 (2.10 – 5.17) | 2.10 (1.68 – 2.61) |
| Hu L et al.            | 3.03 (2.49 – 3.70) | 5.66 (4.12 – 7.79) | 3.30 (2.16 – 5.05) | 1.98 (1.61 – 2.44) |
| Huang J et al.         | 3.02 (2.48 – 3.68) | 5.66 (4.12 – 7.79) | 3.07 (1.99 – 4.73) | 2.10 (1.68 – 2.61) |
| Huang C et al.         | 3.12 (2.55 – 3.80) | 5.82 (4.21 – 8.05) | 3.30 (2.16 – 5.05) | 2.10 (1.68 – 2.61) |
| Hur K et al.           | 3.16 (2.57 – 3.88) | 5.66 (4.12 – 7.79) | 3.44 (2.11 – 5.59) | 2.10 (1.68 – 2.61) |
| Jiang et al.           | 3.08 (2.52 – 3.75) | 5.57 (4.04 – 7.68) | 3.30 (2.16 – 5.05) | 2.10 (1.68 – 2.61) |
| Li Q et al.            | 3.07 (2.51 – 3.75) | 5.66 (4.12 – 7.79) | 3.19 (2.04 – 5.00) | 2.10 (1.68 – 2.61) |
| Liu J et al.           | 3.10 (2.54 – 3.78) | 5.64 (4.10 – 7.77) | 3.30 (2.16 – 5.05) | 2.10 (1.68 – 2.61) |
| Luo X et al.           | 3.13 (2.55 – 3.83) | 5.66 (4.12 – 7.79) | 3.38 (2.10 – 5.42) | 2.10 (1.68 – 2.61) |
| Ma KL et al.           | 3.12 (2.55 – 3.81) | 5.82 (4.21 – 8.04) | 3.30 (2.16 – 5.05) | 2.10 (1.68 – 2.61) |
| Nikpouraghdam M et al. | 3.17 (2.59 – 3.87) | 5.66 (4.12 – 7.79) | 3.53 (2.27 – 5.50) | 2.10 (1.68 – 2.61) |
| Petrilli et al.        | 3.28 (2.62 – 4.10) | 5.66 (4.12 – 7.79) | 3.30 (2.16 – 5.05) | 2.26 (1.69 – 3.02) |
| Qi Di et al.           | 3.13 (2.56 – 3.83) | 6.11 (4.39 – 8.50) | 3.30 (2.16 – 5.05) | 2.10 (1.68 – 2.61) |
| Rossi et al.           | 3.16 (2.57 – 3.88) | 5.66 (4.12 – 7.79) | 3.30 (2.16 – 5.05) | 2.07 (1.62 – 2.63) |
| Russo V et al.         | 3.10 (2.53 – 3.79) | 5.66 (4.12 – 7.79) | 3.30 (2.16 – 5.05) | 2.04 (1.63 – 2.56) |
| Shang W et al.         | 3.10 (2.53 – 3.80) | 5.66 (4.12 – 7.79) | 3.31 (2.05 – 5.34) | 2.10 (1.68 – 2.61) |
| Shi Y et al.           | 3.07 (2.52 – 3.75) | 5.67 (4.08 – 7.89) | 3.30 (2.16 – 5.05) | 2.10 (1.68 – 2.61) |
| Wan S et al.           | 3.06 (2.51 – 3.73) | 5.53 (4.00 – 7.63) | 3.30 (2.16 – 5.05) | 2.10 (1.68 – 2.61) |
| Wang K et al.          | 3.12 (2.55 – 3.82) | 5.66 (4.12 – 7.79) | 3.30 (2.16 – 5.05) | 2.07 (1.65 – 2.60) |
| Wang L et al.          | 3.09 (2.52 – 3.78) | 5.66 (4.12 – 7.79) | 3.30 (2.16 – 5.05) | 2.00 (1.60 – 2.50) |
| Wang X et al.          | 3.12 (2.56 – 3.81) | 5.78 (4.19 – 7.97) | 3.30 (2.16 – 5.05) | 2.10 (1.68 – 2.61) |
| Wang D et al.          | 3.12 (2.55 – 3.82) | 5.66 (4.12 – 7.79) | 3.35 (2.12 – 5.31) | 2.10 (1.68 – 2.61) |
| Wang Z et al.          | 3.06 (2.51 – 3.73) | 5.54 (4.00 – 7.67) | 3.30 (2.16 – 5.05) | 2.10 (1.68 – 2.61) |
| Xu B et al.            | 3.09 (2.53 – 3.77) | 5.66 (4.12 – 7.79) | 3.30 (2.16 – 5.05) | 2.04 (1.64 – 2.55) |
| Xu PP et al.           | 2.95 (2.43 – 3.57) | 4.99 (3.52 – 7.07) | 3.30 (2.16 – 5.05) | 2.10 (1.68 – 2.61) |
| Yang P et al.          | 3.08 (2.53 – 3.76) | 5.60 (4.06 – 7.72) | 3.30 (2.16 – 5.05) | 2.10 (1.68 – 2.61) |
| Yuan B et al.          | 3.02 (2.48 – 3.68) | 5.52 (3.90 – 7.81) | 3.30 (2.16 – 5.05) | 2.10 (1.68 – 2.61) |
| Zhou F et al.          | 3.01 (2.48 – 3.66) | 5.66 (4.12 – 7.79) | 3.01 (2.01 – 4.52) | 2.10 (1.68 – 2.61) |
| Zhu Z et al.           | 3.10 (2.54 – 3.79) | 5.66 (4.12 – 7.79) | 3.28 (2.11 – 5.11) | 2.10 (1.68 – 2.61) |

## Supplementary figure 1. Meta-analysis of the prevalence of hypertension

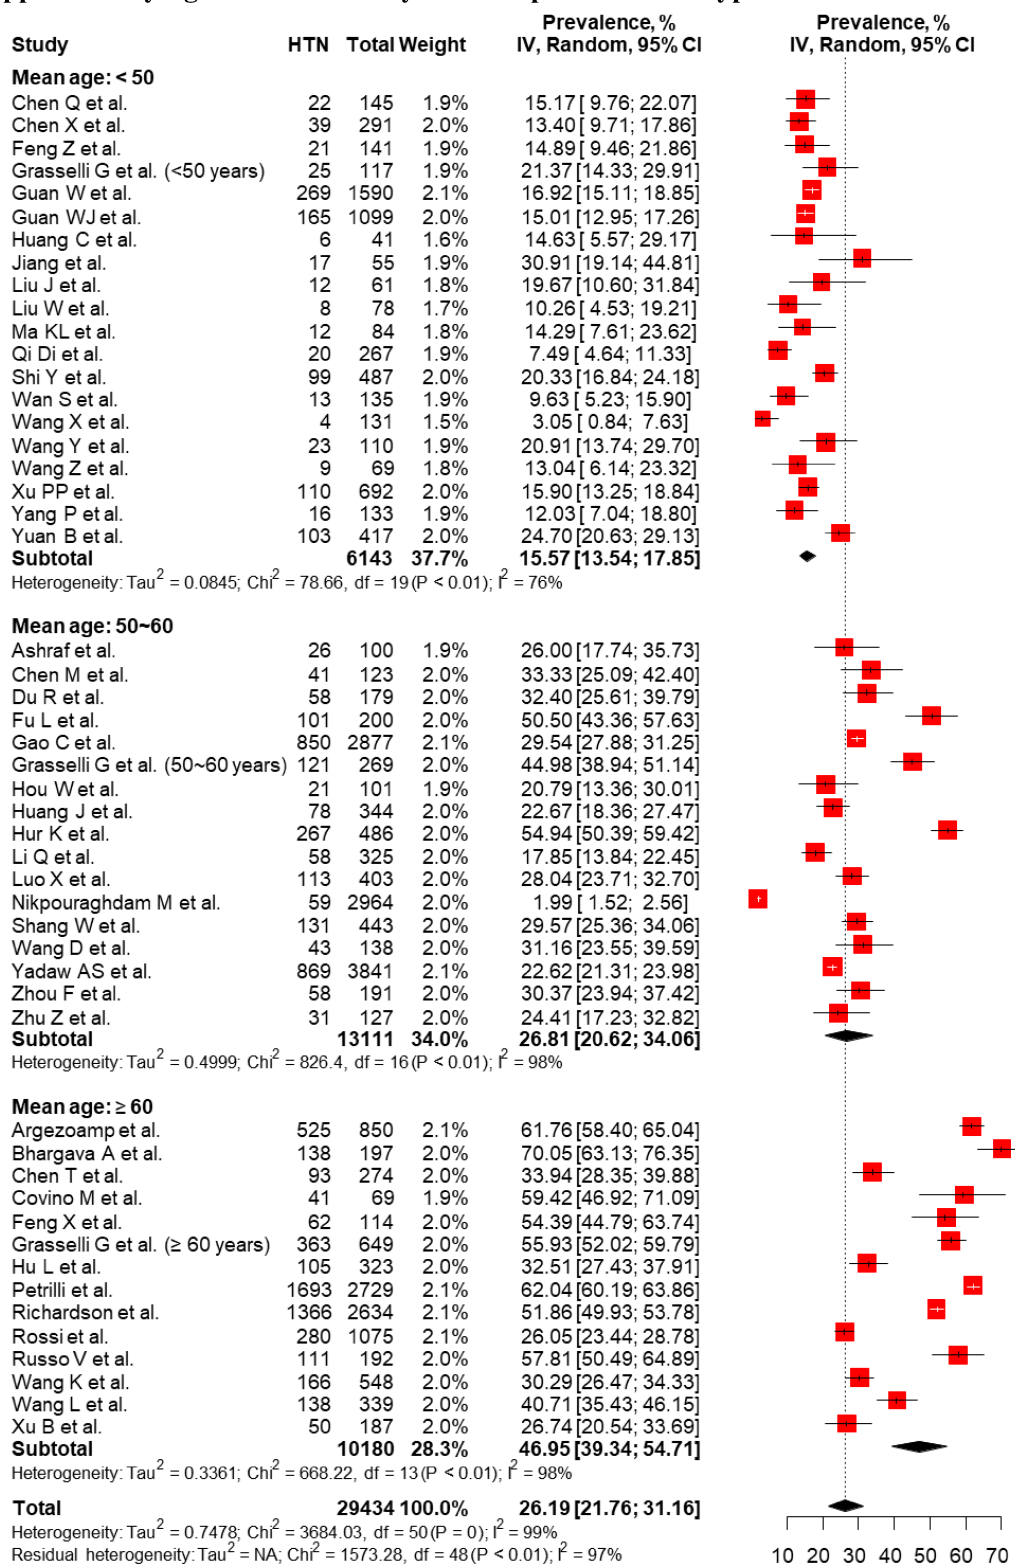

## Supplementary figure 2. Meta-analysis of the clinical outcomes of patients with hypertension: severe COVID-19

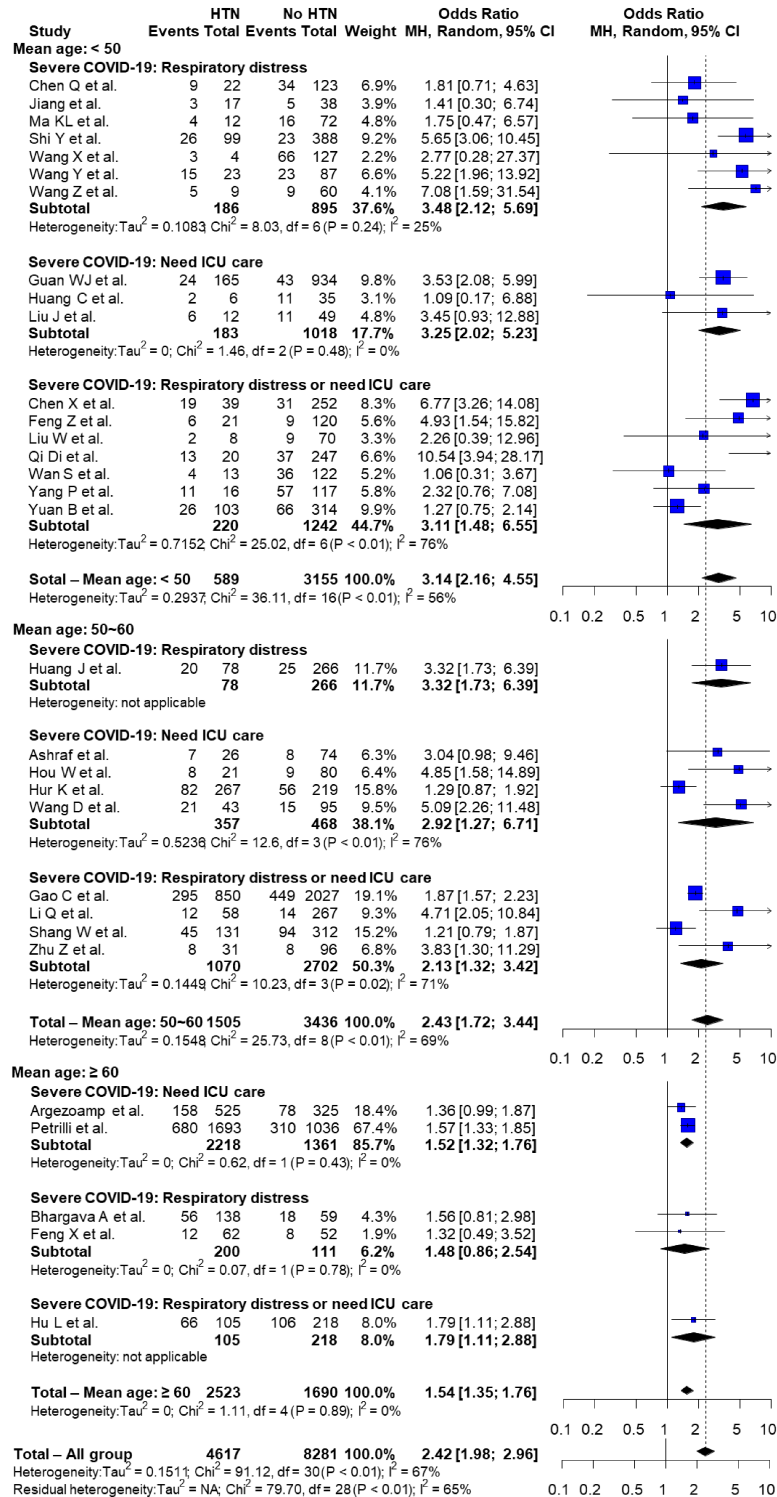

### Supplementary figure 3. Meta-analysis of the clinical outcomes of patients with hypertension: death

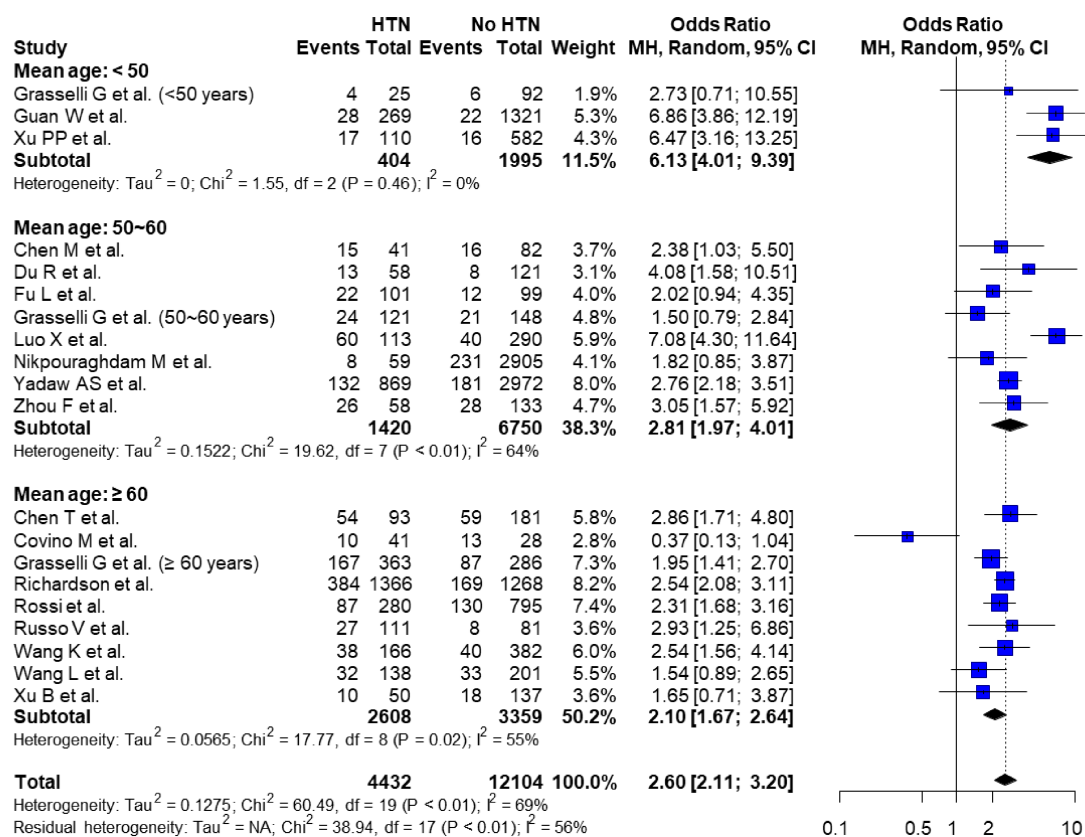

### Supplementary figure 4. Meta-analysis of the clinical outcomes of patients with hypertension: fatal outcomes

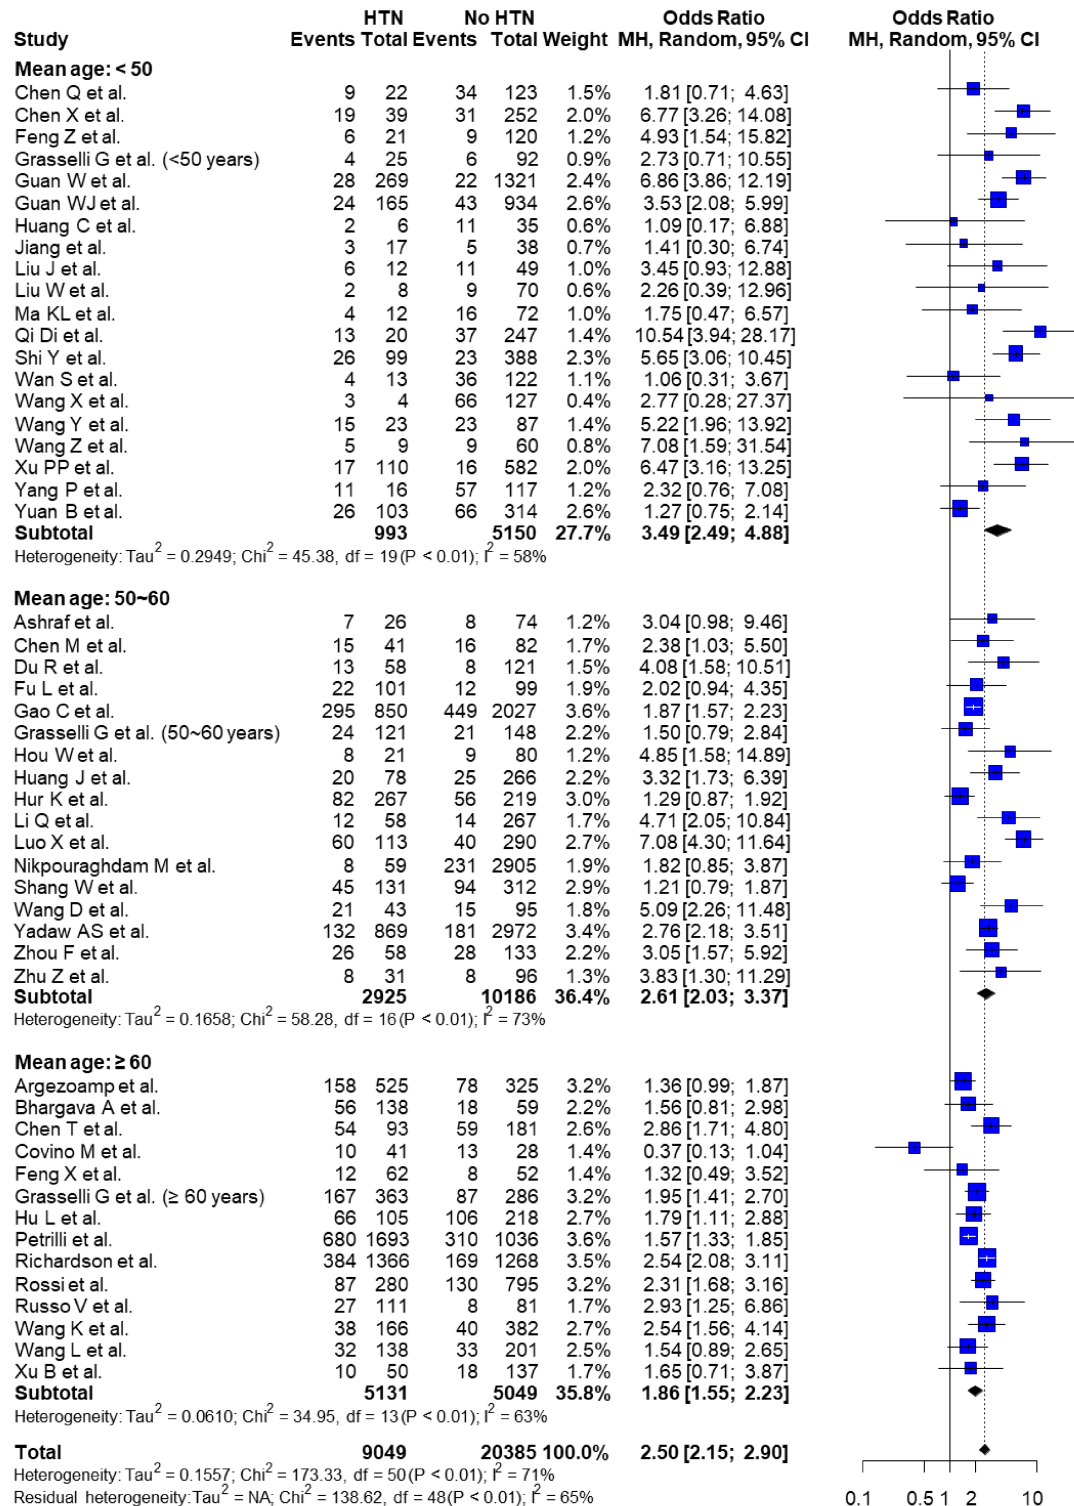

Supplementary figure 5. Risk difference of fatal outcome in patients with hypertension

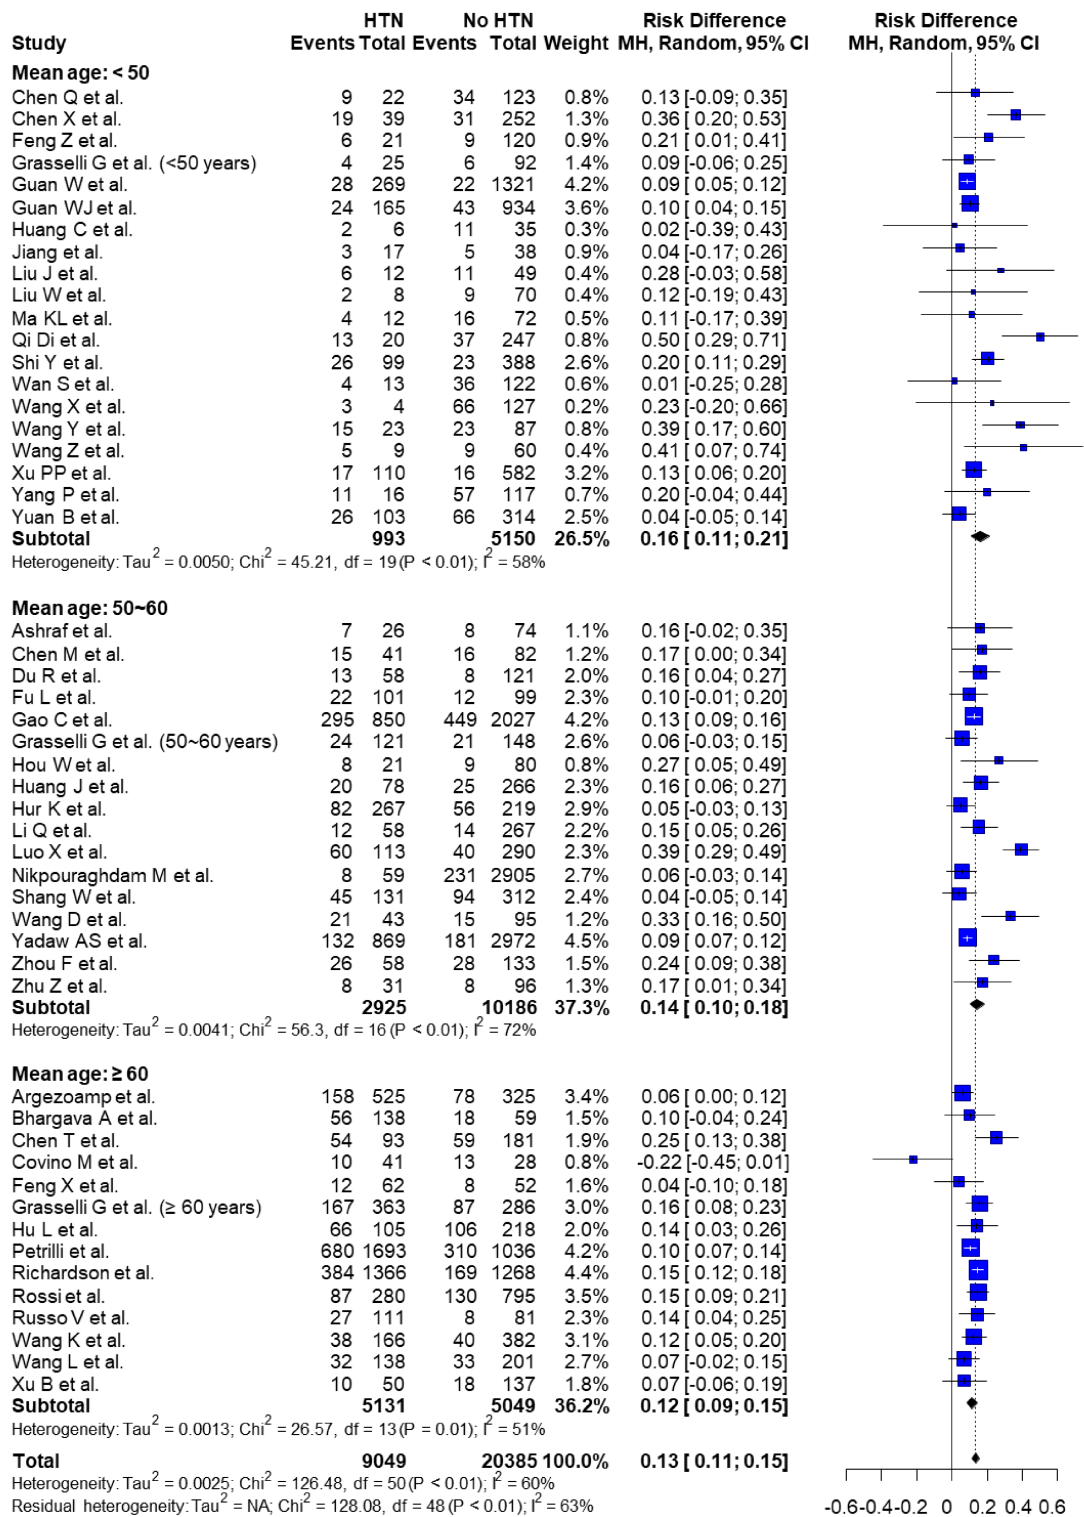



## Supplementary figure 6. Meta-analysis of the prevalence of diabetes

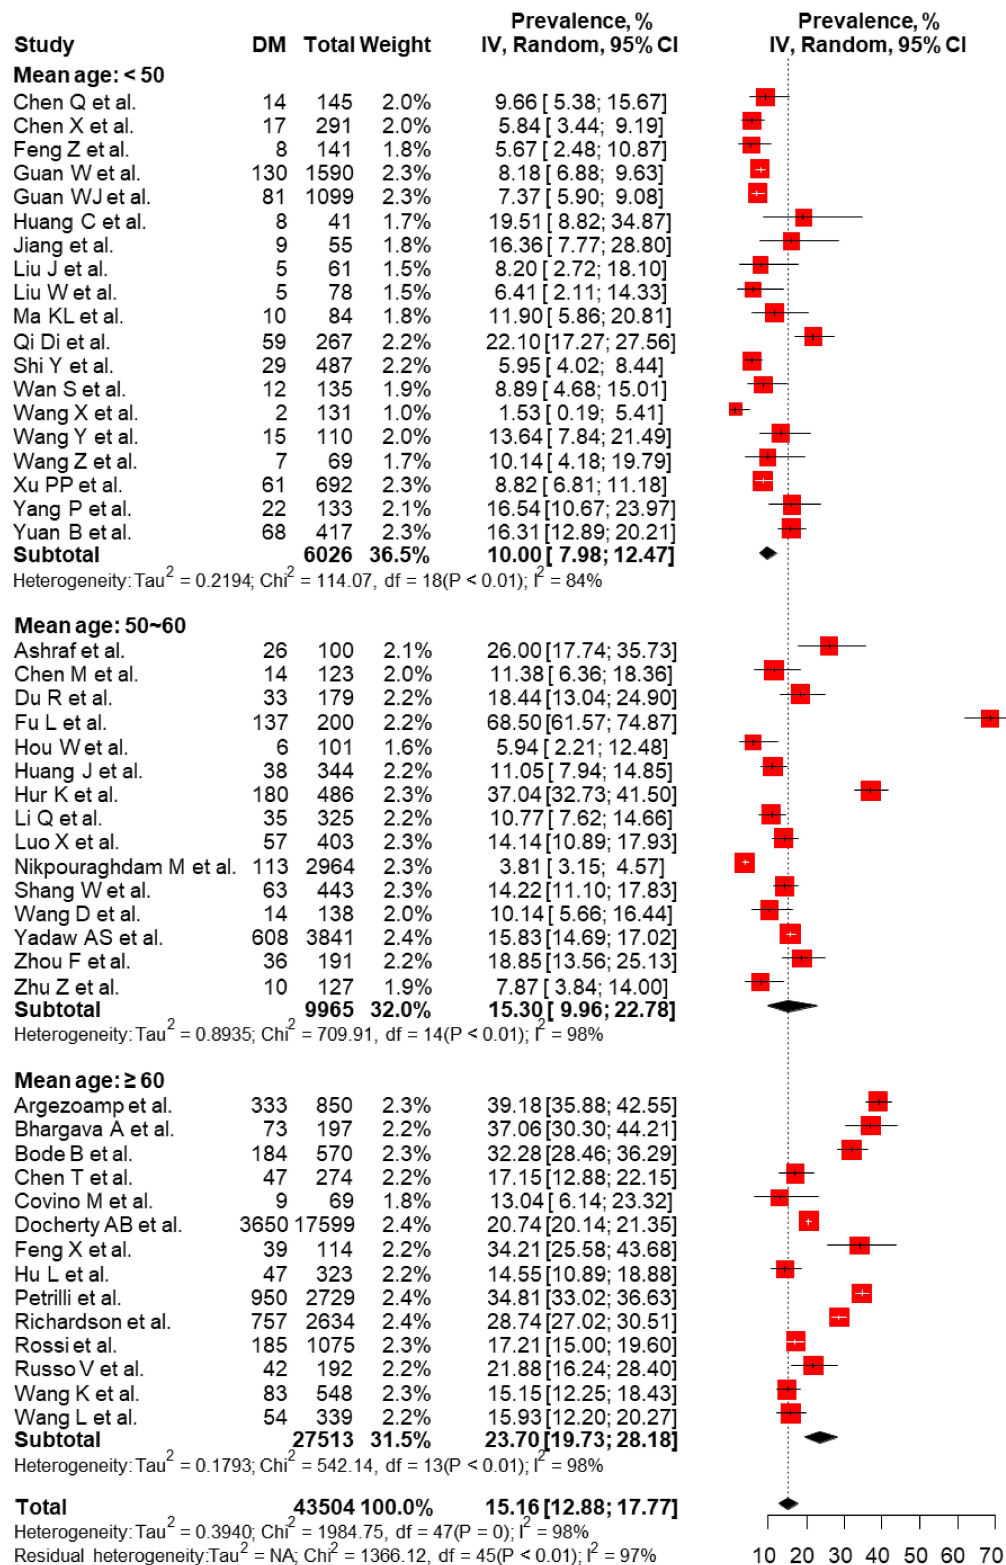

### Supplementary figure 7. Meta-analysis of the clinical outcomes of patients with diabetes: severe COVID-19

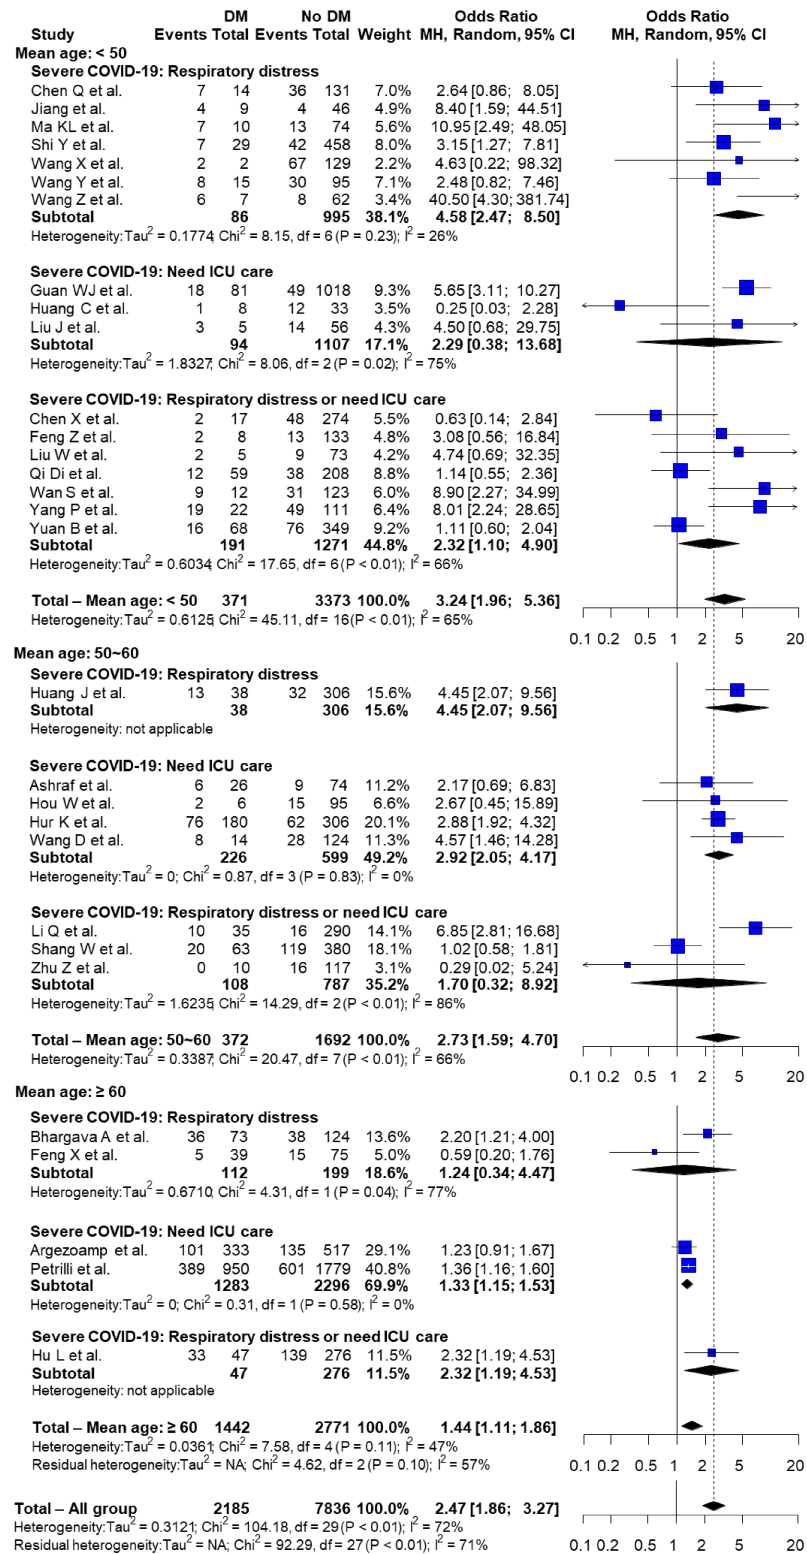

### Supplementary figure 8. Meta-analysis of the clinical outcomes of patients with diabetes: death

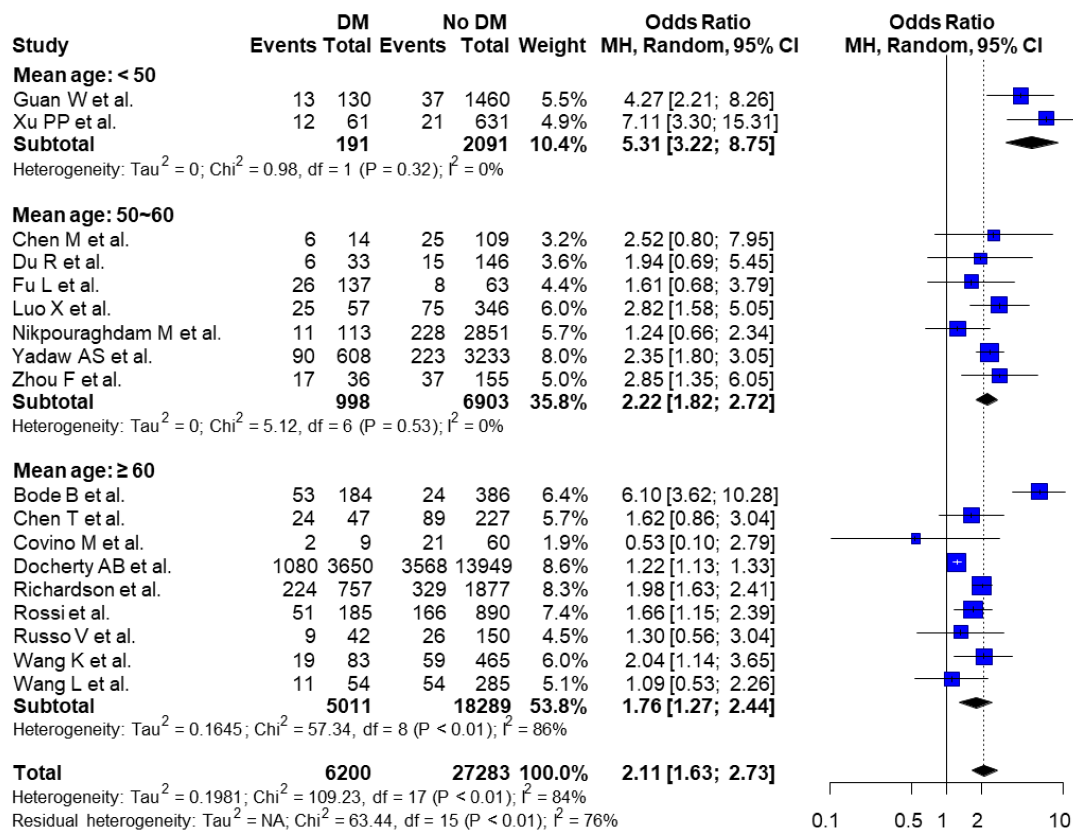

### Supplementary figure 9. Meta-analysis of the clinical outcomes of patients with diabetes: fatal outcomes

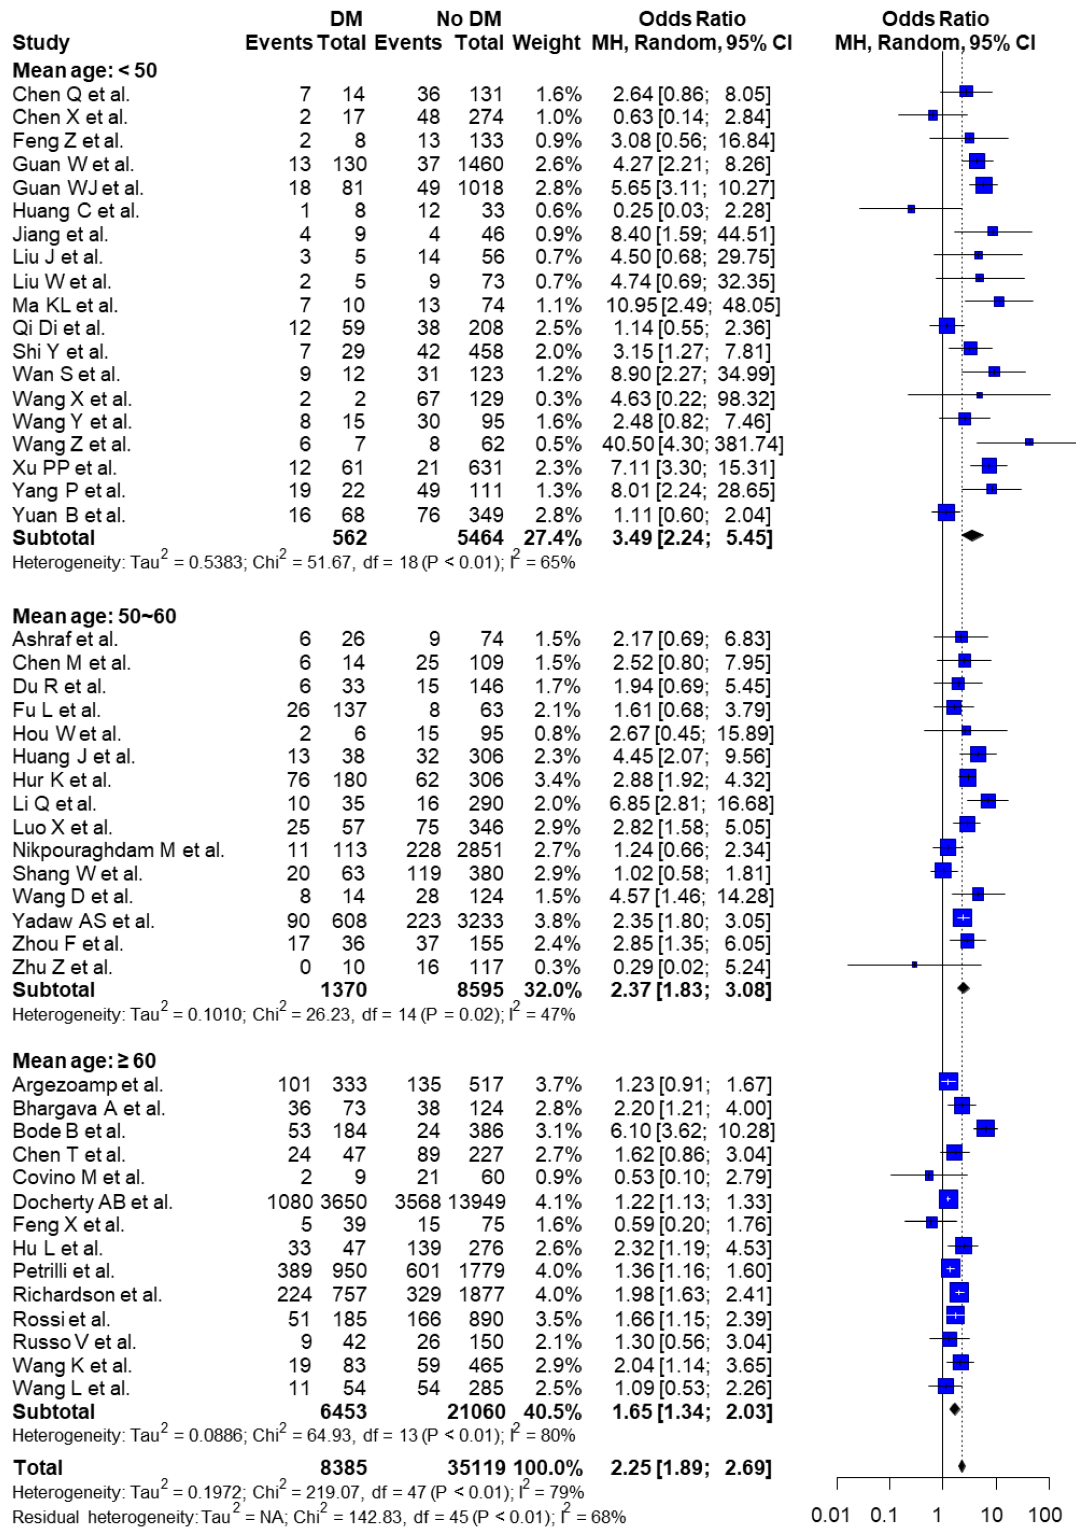

## Supplementary figure 10. Risk difference of fatal outcome in patients with diabetes

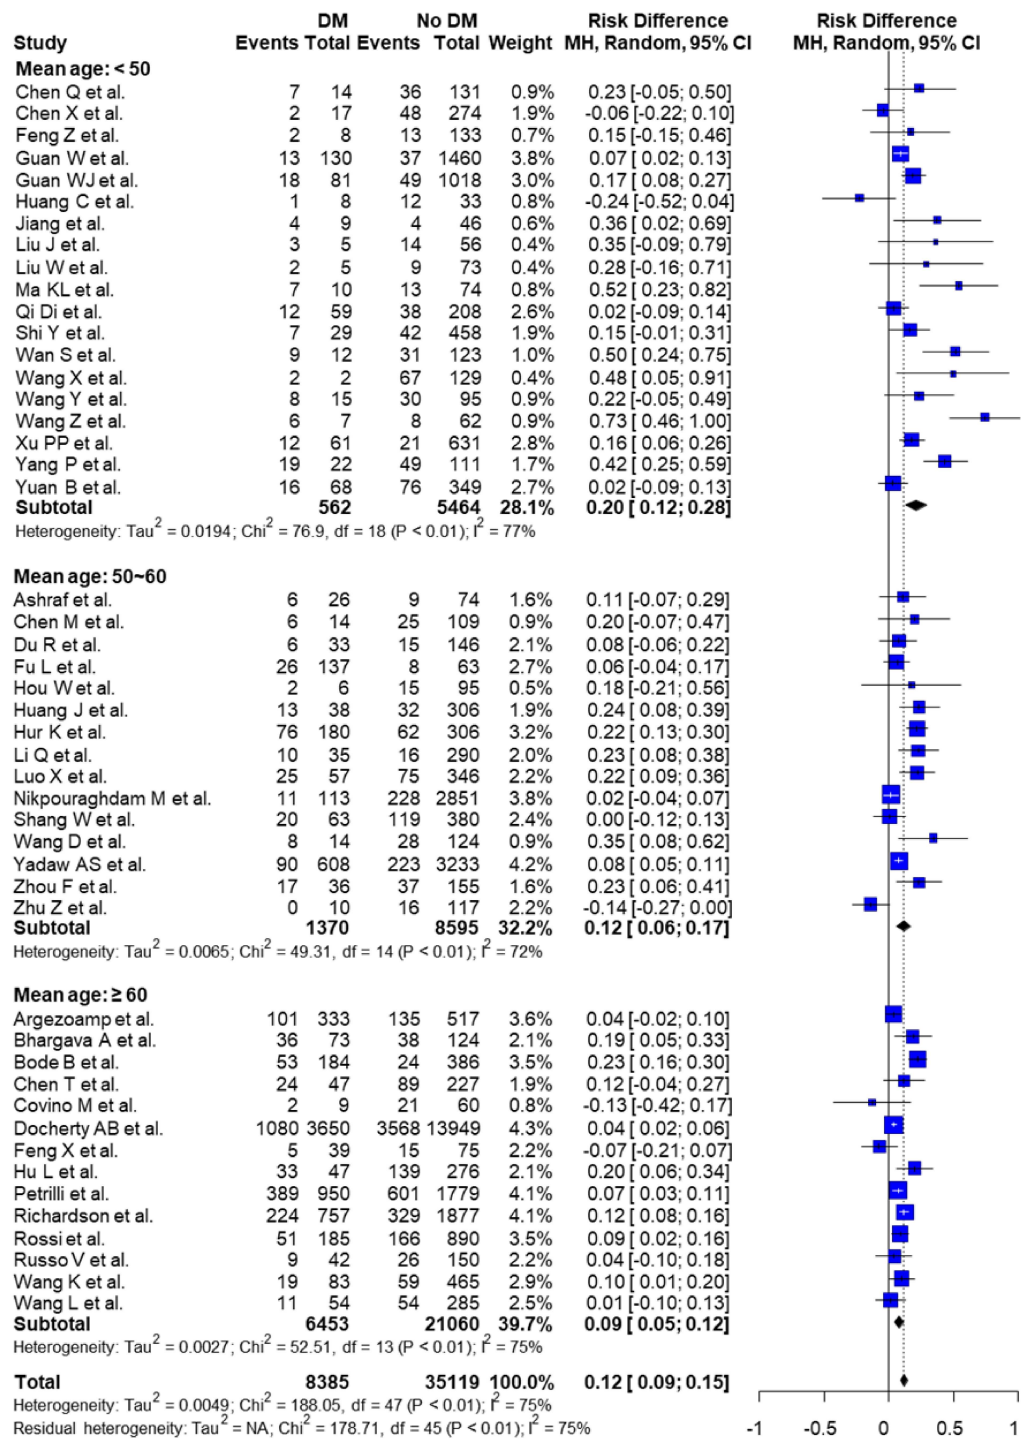

## Supplementary figure 11. Meta-analysis of the prevalence of CVD

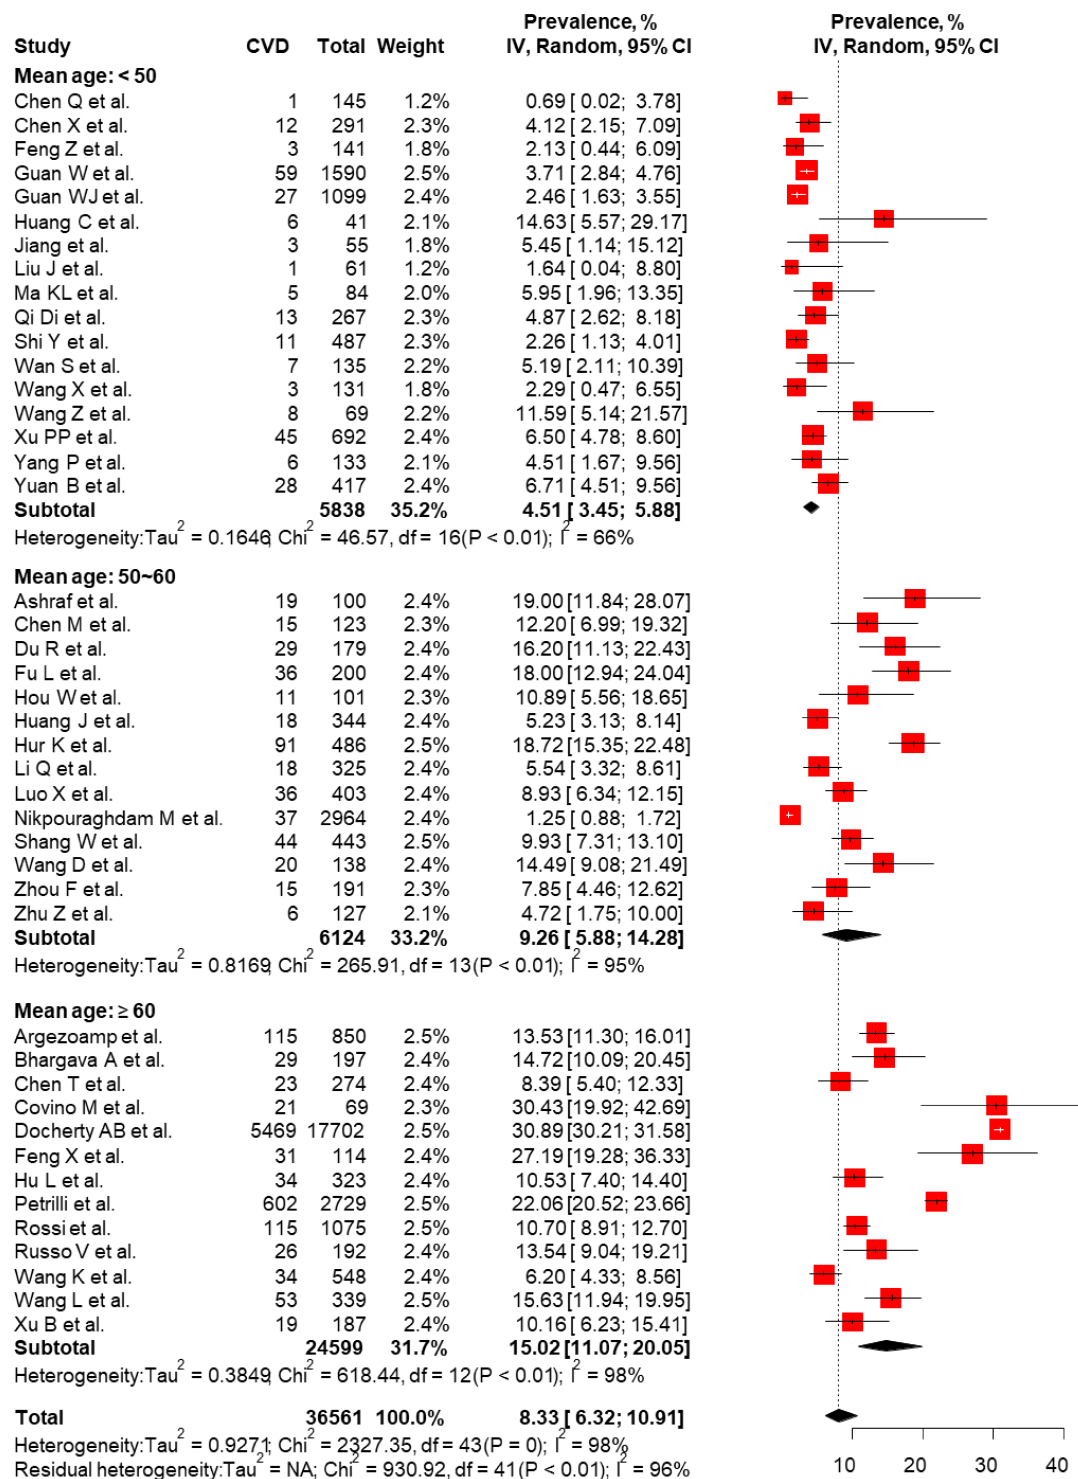

## Supplementary figure 12. Meta-analysis of the clinical outcomes of patients with CVD: severe COVID-19

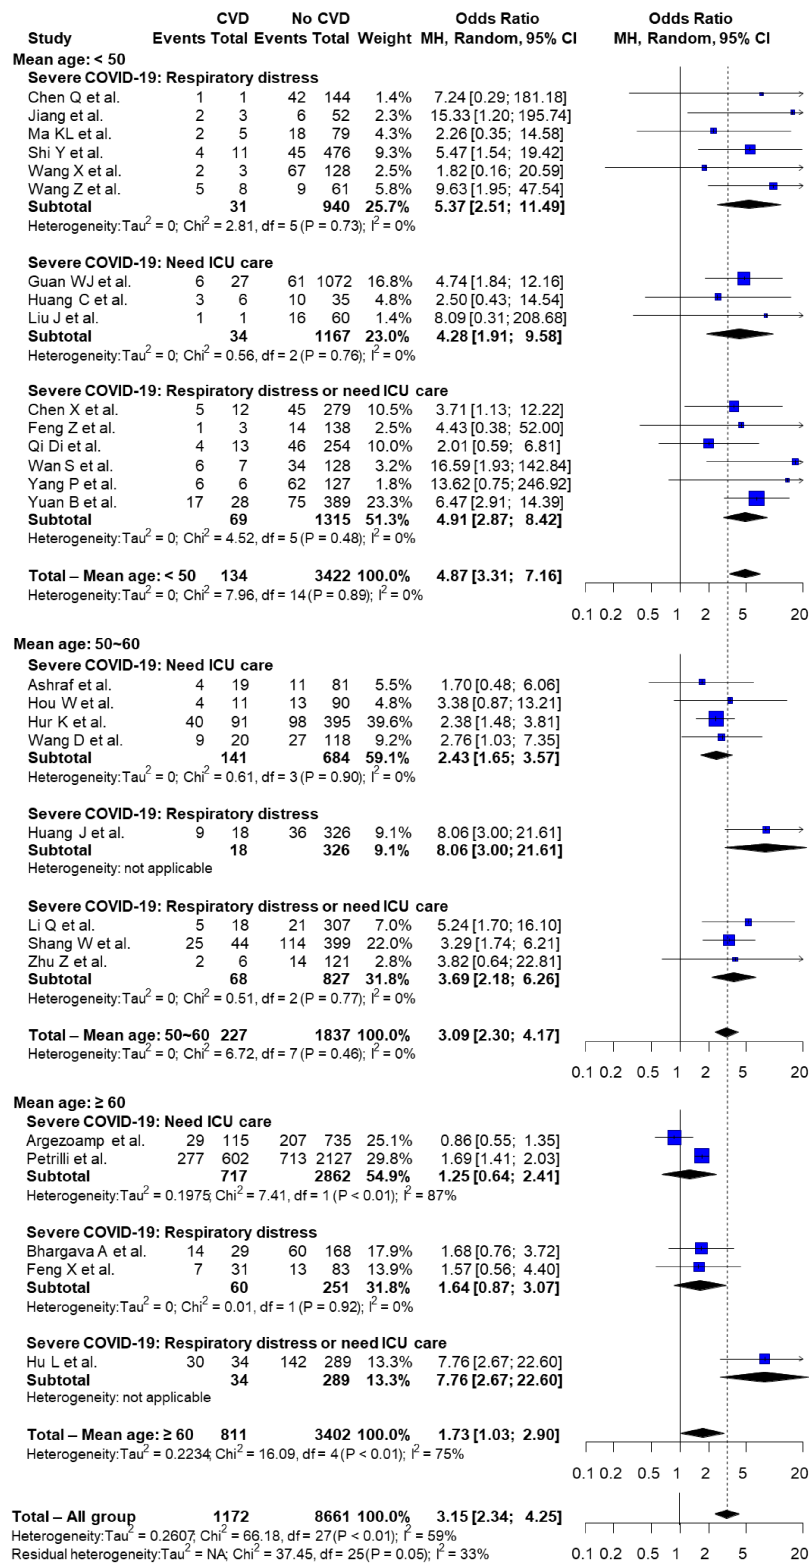

### Supplementary figure 13. Meta-analysis of the clinical outcomes of patients with CVD: death

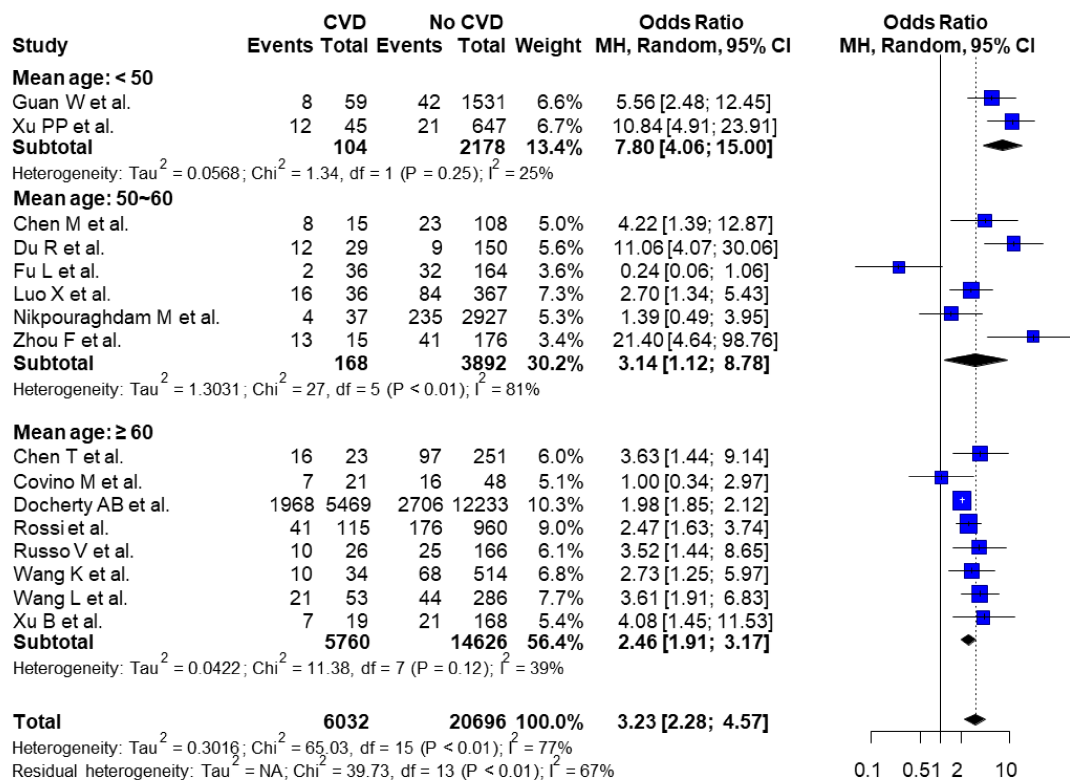



### Supplementary figure 14. Meta-analysis of the clinical outcomes of patients with CVD: fatal outcomes

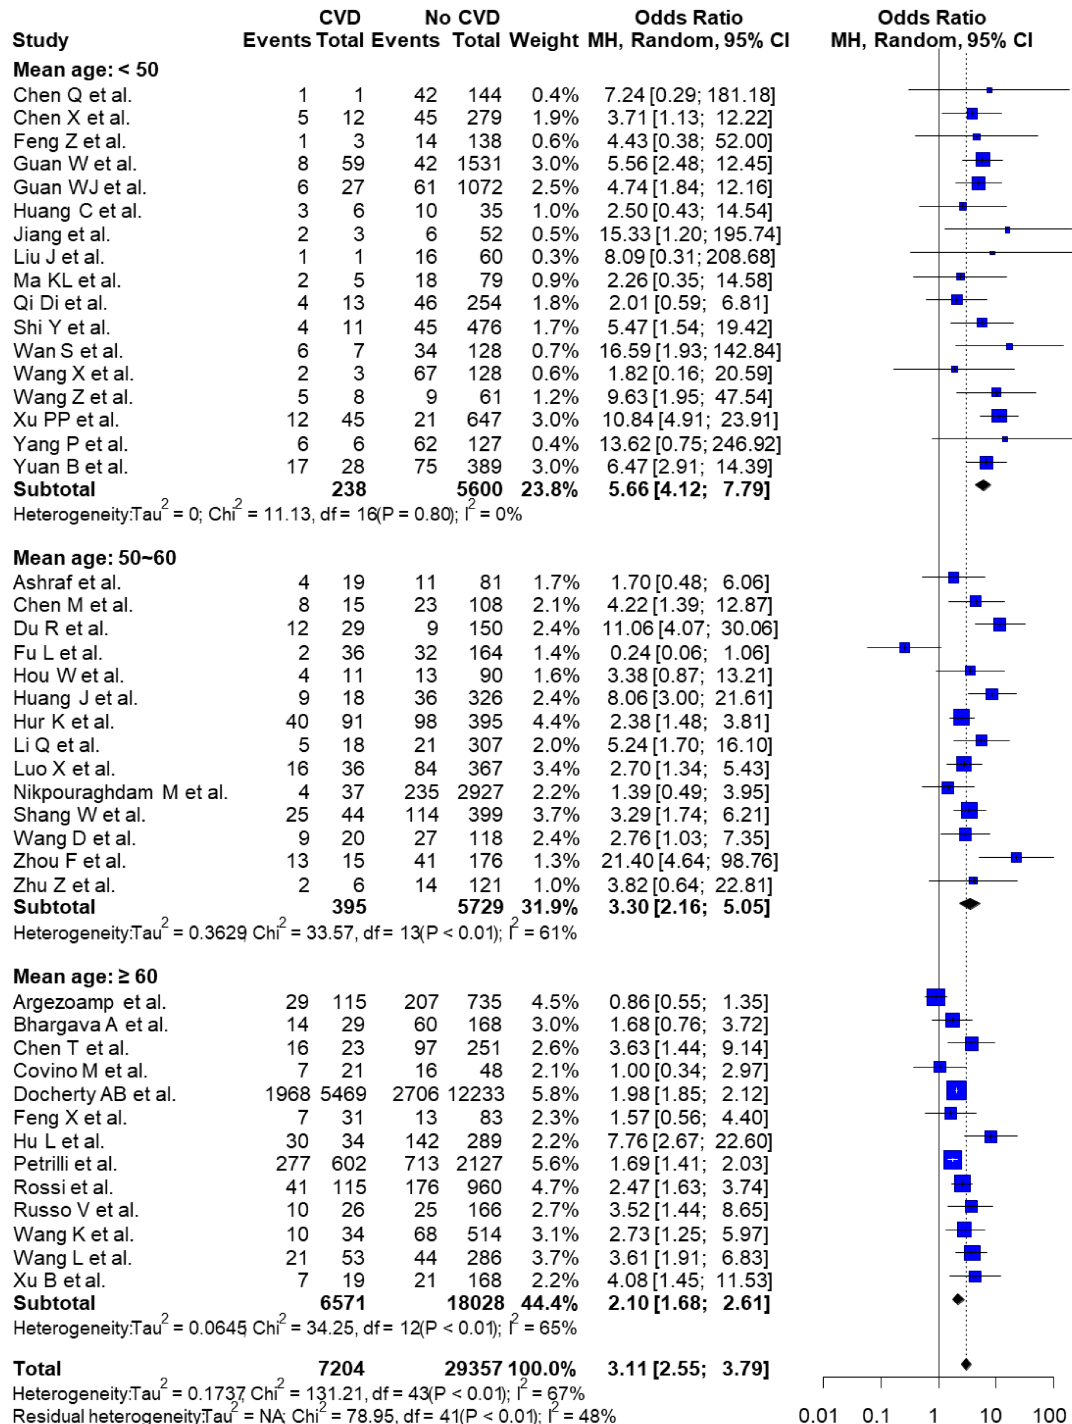

## Supplementary figure 15. Risk difference of fatal outcome in patients with CVD

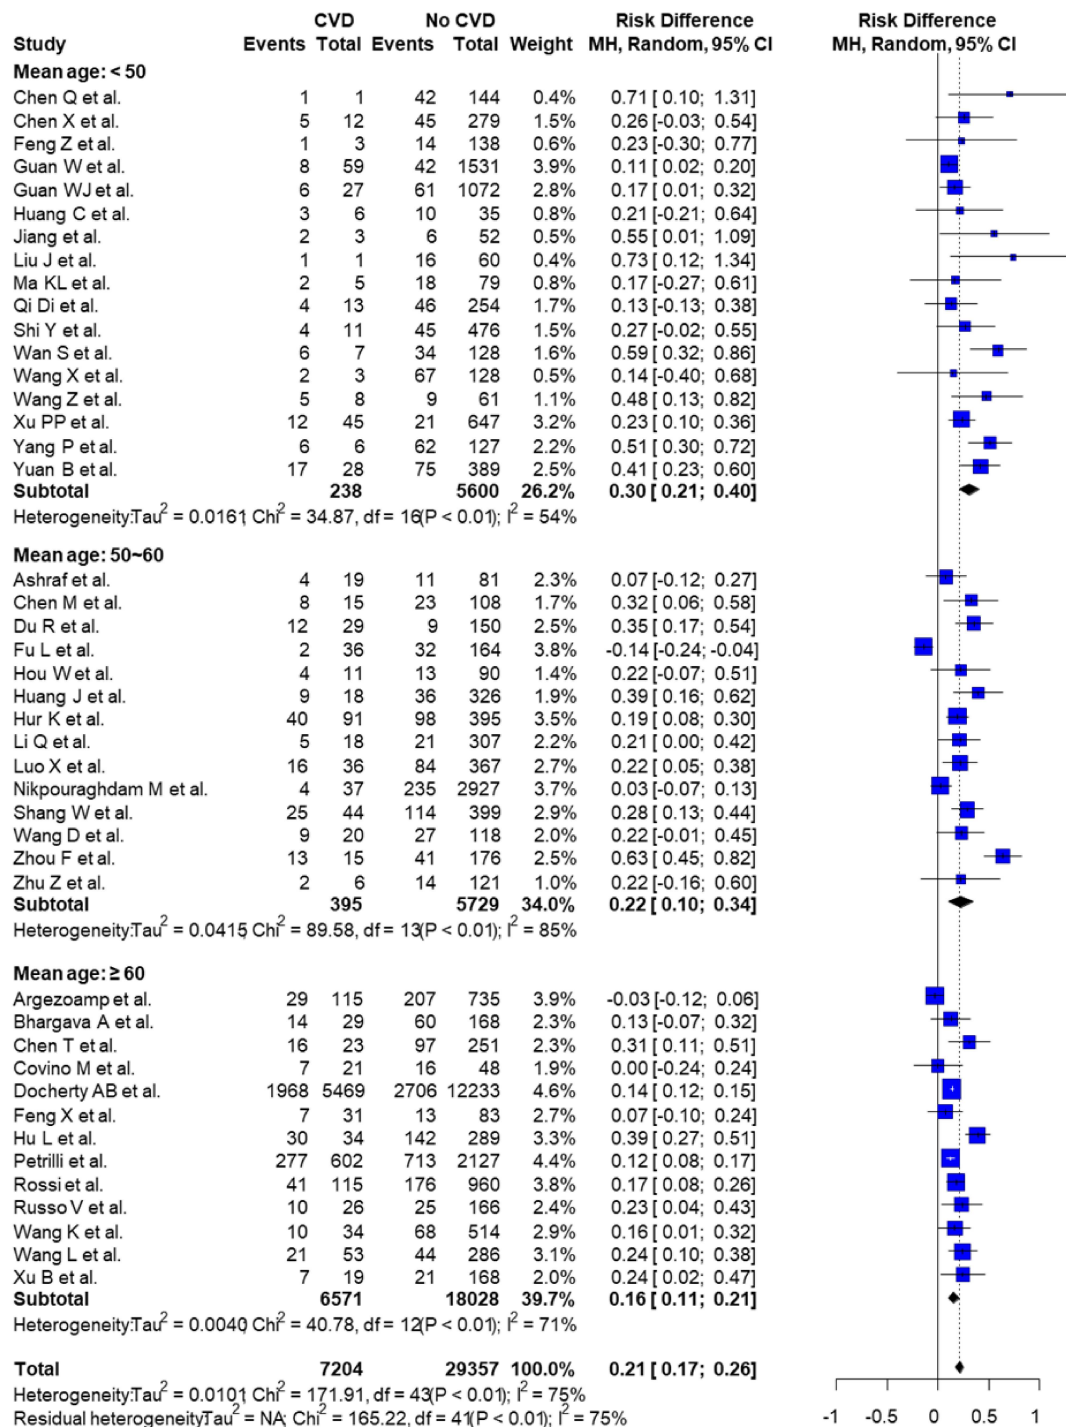

**Supplementary figure 16. Contour-enhanced funnel plot**

**A. Hypertension**

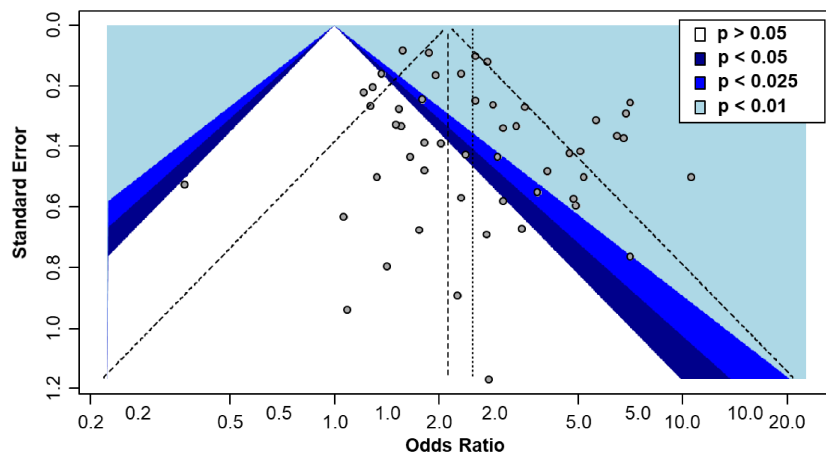

**B. Diabetes**

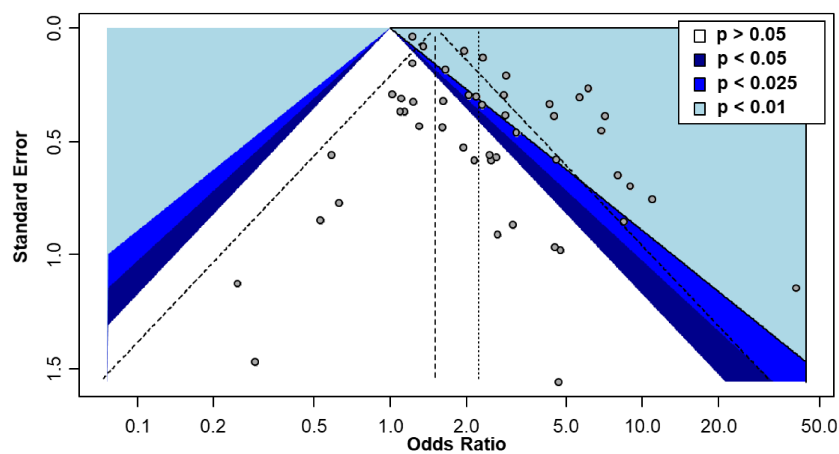

**C. Cardiovascular disease**

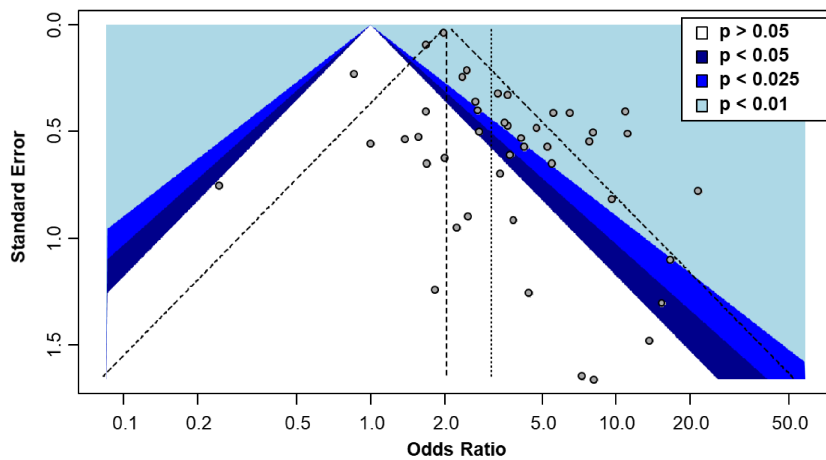

## Reference

1. Argenziano MG, Bruce SL, Slater CL, et al. Characterization and clinical course of 1000 Patients with COVID-19 in New York: retrospective case series. *BMJ* 2020;29:369:m1996. doi: 10.1136/bmj.m1996
2. Ashraf MA, Shokouhi N, Shirali E, et al. COVID-19 in Iran, a comprehensive investigation from exposure to treatment outcomes. *medRxiv* 2020: 2020.04.20.20072421. doi: 10.1101/2020.04.20.20072421
3. Bhargava A, Fukushima EA, Levine M, et al. Predictors for Severe COVID-19 Infection. *Clin Infect Dis* 2020 doi: 10.1093/cid/ciaa674
4. Bode B, Garrett V, Messler J, et al. Glycemic Characteristics and Clinical Outcomes of COVID-19 Patients Hospitalized in the United States. *J Diabetes Sci Technol* 2020:1932296820924469. doi: 10.1177/1932296820924469
5. Chen M, Fan Y, Wu X, et al. Clinical characteristics and risk factors for fatal outcome in patients with 2019-coronavirus infected disease (COVID-19) in Wuhan, China. *Preprints with LANCET* 2020 doi: 10.2139/ssrn.3546069
6. Chen Q, Zheng Z, Zhang C, et al. Clinical characteristics of 145 patients with corona virus disease 2019 (COVID-19) in Taizhou, Zhejiang, China. *Infection* 2020:1-9. doi: 10.1007/s15010-020-01432-5
7. Chen T, Wu D, Chen H, et al. Clinical characteristics of 113 deceased patients with coronavirus disease 2019: retrospective study. *BMJ* 2020;368:m1091. doi: 10.1136/bmj.m1091
8. Chen X, Zheng F, Qing Y, et al. Epidemiological and clinical features of 291 cases with coronavirus disease 2019 in areas adjacent to Hubei, China: a double-center observational study. *medRxiv* 2020.03.03.20030353. doi: 10.1101/2020.03.03.20030353
9. Covino M, De Matteis G, Santoro M, et al. Clinical characteristics and prognostic factors in COVID-19 patients aged  $\geq 80$  years. *Geriatr Gerontol Int* 2020 doi: 10.1111/ggi.13960
10. Docherty AB, Harrison EM, Green CA, et al. Features of 20 133 UK patients In-hospital with covid-19 using the ISARIC WHO Clinical Characterisation Protocol: prospective observational cohort study. *BMJ* 2020;369:m1985. doi: 10.1136/bmj.m1985
11. Du RH, Liang LR, Yang CQ, et al. Predictors of mortality for patients with COVID-19 pneumonia caused by SARS-CoV-2: a prospective cohort study. *Eur Respir J* 2020;55(5) doi: 10.1183/13993003.00524-2020
12. Feng X, Li P, Ma L, et al. Clinical Characteristics and Short-Term Outcomes of Severe Patients with COVID-19 in Wuhan, China. *Front Med (Lausanne)* 2020;7:491. doi: 10.3389/fmed.2020.00491
13. Feng Z, Yu Q, Yao S, et al. Early Prediction of Disease Progression in 2019 Novel Coronavirus Pneumonia Patients Outside Wuhan with CT and Clinical Characteristics. *medRxiv* 2020.02.19.20025296. doi: 10.1101/2020.02.19.20025296
14. Fu L, Fei J, Xiang H-X, et al. Influence factors of death risk among COVID-19 patients in Wuhan, China: a hospital-based case-cohort study. *medRxiv* 2020.03.13.20035329. doi: 10.1101/2020.03.13.20035329
15. Gao C, Cai Y, Zhang K, et al. Association of hypertension and antihypertensive treatment with COVID-19 mortality: a retrospective observational study. *Eur Heart J* 2020;41(22):2058-66. doi: 10.1093/eurheartj/ehaa433
16. Guan WJ, Liang WH, Zhao Y, et al. Comorbidity and its impact on 1590 patients with COVID-19 in China: a nationwide analysis. *Eur Respir J* 2020;55(5) doi: 10.1183/13993003.00547-2020
17. Guan W-j, Ni Z-y, Hu Y, et al. Clinical Characteristics of Coronavirus Disease 2019 in China. *N Engl J Med* 2020;382(18):1708-20. doi: 10.1056/NEJMoa2002032
18. Grasselli G, Zangrillo A, Zanella A, et al. Baseline Characteristics and Outcomes of 1591 Patients Infected With SARS-CoV-2 Admitted to ICUs of the Lombardy Region, Italy. *JAMA* 2020;323(16):1574-81. doi: 10.1001/jama.2020.5394
19. Hou W, Zhang W, Jin R, et al. Risk factors for disease progression In-hospital ized patients with COVID-19: a retrospective cohort study. *Infect Dis (Lond)* 2020;52(7):498-505. doi: 10.1080/23744235.2020.1759817
20. Hu L, Chen S, Fu Y, et al. Risk Factors Associated with Clinical Outcomes in 323 COVID-19 Hospitalized Patients in Wuhan, China. *Clin Infect Dis* 2020 doi: 10.1093/cid/ciaa539
21. Huang J, Cheng A, Lin S, et al. Individualized prediction nomograms for disease progression in mild COVID-19. *J Med Virol* 2020 doi: 10.1002/jmv.25969
22. Huang C, Wang Y, Li X, et al. Clinical features of patients infected with 2019 novel coronavirus in

- Wuhan, China. *Lancet* 2020;395(10223):497-506. doi: 10.1016/s0140-6736(20)30183-5
23. Hur K, Price CPE, Gray EL, et al. Factors Associated With Intubation and Prolonged Intubation In-hospital ized Patients With COVID-19. *Otolaryngol Head Neck Surg* 2020;194:599-640. doi: 10.1177/0194599820929640
  24. Jiang X, Tao J, Wu H, et al. Clinical features and management of severe COVID-19: A retrospective study in Wuxi, Jiangsu Province, China. *medRxiv* 2020.04.10.20060335. doi: 10.1101/2020.04.10.20060335
  25. Qiang Li YL, Jianliang Zhang et al. Clinical Characteristics of SARS-CoV-2 Infections Involving 325 Hospitalized Patients outside Wuhan. *PREPRINT available at Research Square* 2020 doi: 10.21203/rs.3.rs-18699/v1
  26. Liu J, Liu Y, Xiang P, et al. Neutrophil-to-Lymphocyte Ratio Predicts Severe Illness Patients with 2019 Novel Coronavirus in the Early Stage. *Transl Med* 2020;18(1):206. doi: 10.1186/s12967-020-02374-0
  27. Liu W, Tao Z-W, Wang L, et al. Analysis of factors associated with disease outcomes In-hospital ized patients with 2019 novel coronavirus disease. *Chin Med J (Engl)* 2020;133(9):1032-38. doi: 10.1097/CM9.0000000000000775
  28. Luo X, Xia H, Yang W, et al. Characteristics of patients with COVID-19 during epidemic ongoing outbreak in Wuhan, China. *medRxiv* 2020.03.19.20033175. doi: 10.1101/2020.03.19.20033175
  29. Ma K-L, Liu Z-H, Cao C-f, et al. COVID-19 Myocarditis and Severity Factors : An Adult Cohort Study. *medRxiv* 2020.03.19.20034124. doi: 10.1101/2020.03.19.20034124
  30. Nikpouraghdam M, Jalali Farahani A, Alishiri G, et al. Epidemiological characteristics of coronavirus disease 2019 (COVID-19) patients in IRAN: A single center study. *J Clin Virol* 2020;127:104378-78. doi: 10.1016/j.jcv.2020.104378
  31. Petrilli CM, Jones SA, Yang J, et al. Factors associated with hospital admission and critical illness among 5279 people with coronavirus disease 2019 in New York City: prospective cohort study. *BMJ* 2020;369:m1966-m66. doi: 10.1136/bmj.m1966
  32. Qi D, Yan X, Tang X, et al. Epidemiological and clinical features of 2019-nCoV acute respiratory disease cases in Chongqing municipality, China: a retrospective, descriptive, multiple-center study. *medRxiv* 2020.03.01.20029397. doi: 10.1101/2020.03.01.20029397
  33. Richardson S, Hirsch JS, Narasimhan M, et al. Presenting Characteristics, Comorbidities, and Outcomes Among 5700 Patients Hospitalized With COVID-19 in the New York City Area. *JAMA* 2020;323(20):2052-9. doi: 10.1001/jama.2020.6775
  34. Giorgi Rossi P, Marino M, Formisano D, et al. Characteristics and outcomes of a cohort of SARS-CoV-2 patients in the Province of Reggio Emilia, Italy. *PLoS One* 2020; 27;15(8):e0238281. doi: 10.1371/journal.pone.0238281
  35. Russo V, Di Maio M, Attena E, et al. Clinical impact of pre-admission antithrombotic therapy In-hospital ized patients with COVID-19: A multicenter observational study. *Pharmacol Res* 2020;159:104965. doi: 10.1016/j.phrs.2020.104965
  36. Shang W, Dong J, Ren Y, et al. The value of clinical parameters in predicting the severity of COVID-19. *J Med Virol* 2020 doi: 10.1002/jmv.26031
  37. Shi Y, Yu X, Zhao H, et al. Host susceptibility to severe COVID-19 and establishment of a host risk score: findings of 487 cases outside Wuhan. *Crit Care* 2020;24(1):108. doi: 10.1186/s13054-020-2833-7
  38. Wan S, Xiang Y, Fang W, et al. Clinical features and treatment of COVID-19 patients in northeast Chongqing. *J Med Virol* 2020;92(7):797-806. doi: 10.1002/jmv.25783
  39. Wang K, Zhang Z, Yu M, et al. 15-day mortality and associated risk factors for hospitalized patients with COVID-19 in Wuhan, China: an ambispective observational cohort study. *Intensive Care Med* 2020;1-3. doi: 10.1007/s00134-020-06047-w
  40. Wang L, He W, Yu X, et al. Coronavirus disease 2019 in elderly patients: Characteristics and prognostic factors based on 4-week follow-up. *J Infect* 2020;80(6):639-45. doi: 10.1016/j.jinf.2020.03.019
  41. Wang X, Xu H, Jiang H, et al. The Clinical Features and Outcomes of Discharged Coronavirus Disease 2019 Patients : A Prospective Cohort Study. *QJM* 2020 doi: 10.1093/qjmed/hcaa178
  42. Wang Y, Zhou Y, Yang Z, et al. Clinical Characteristics of Patients with Severe Pneumonia Caused by the 2019 Novel Coronavirus in Wuhan, China. *medRxiv* 2020.03.02.20029306. doi: 10.1101/2020.03.02.20029306
  43. Wang D, Hu B, Hu C, et al. Clinical Characteristics of 138 Hospitalized Patients With 2019 Novel

- Coronavirus-Infected Pneumonia in Wuhan, China. *JAMA* 2020;323(11):1061-9. doi: 10.1001/jama.2020.1585
44. Wang Z, Yang B, Li Q, et al. Clinical Features of 69 Cases with Coronavirus Disease 2019 in Wuhan, China. *Clin Infect Dis* 2020 doi: 10.1093/cid/ciaa272
45. Xu B, Fan CY, Wang AL, et al. Suppressed T cell-mediated immunity in patients with COVID-19: A clinical retrospective study in Wuhan, China. *J Infect* 2020;81(1):e51-e60. doi: 10.1016/j.jinf.2020.04.012
46. Xu PP, Tian RH, Luo S, et al. Risk factors for adverse clinical outcomes with COVID-19 in China: a multicenter, retrospective, observational study. *Theranostics* 2020;10(14):6372-83. doi: 10.7150/thno.46833
47. Yadaw AS, Li YC, Bose S, et al. Clinical predictors of COVID-19 mortality. *medRxiv* 2020 doi: 10.1101/2020.05.19.20103036
48. Yang P, Wang P, Song Y, et al. A retrospective study on the epidemiological characteristics and establishment of an early warning system of severe COVID-19 patients. *J Med Virol* 2020 doi: 10.1002/jmv.26022
49. Bo Yuan Y-WA, Yong-Xin Chen et al. Epidemiological Characteristics of 417 patients infected with COVID-19 and 368 discharged cases among them in Shenzhen City, China. *PREPRINT available at Research Square* 2020 doi: 10.21203/rs.3.rs-19554/v1
50. Zhou F, Yu T, Du R, et al. Clinical course and risk factors for mortality of adult inpatients with COVID-19 in Wuhan, China: a retrospective cohort study. *Lancet* 2020;395(10229):1054-62. doi: 10.1016/s0140-6736(20)30566-3
51. Zhu Z, Cai T, Fan L, et al. Clinical value of immune-inflammatory parameters to assess the severity of coronavirus disease 2019. *Int J Infect Dis* 2020;95:332-39. doi: 10.1016/j.ijid.2020.04.04
